# Supplementary material for: Unlocking Kuhn Verdazyls: New Synthetic Approach and Useful Mechanistic Insights
Source: MDPI journal article supplement (doi:10.3390/ijms24032693), 2023-01-31
Supplement: s1 [file s1]

**Supporting Information for**  
**Kuhn verdazyls: new insights into the synthesis and mechanism of formation**

Fedor E. Teslenko, Leonid L. Fershtat\*

Laboratory of Nitrogen Compounds, N.D. Zelinsky Institute of Organic Chemistry, Russian Academy of Sciences, Leninsky prosp., 47, 119991 Moscow, Russian Federation; fershtat@ioc.ac.ru (L.L.F.)

**Table of Contents**

|                                       |           |
|---------------------------------------|-----------|
| <b>S1. EPR spectra.....</b>           | <b>2</b>  |
| <b>S2. UV-Vis spectra .....</b>       | <b>13</b> |
| <b>S3. Crystallographic data.....</b> | <b>24</b> |
| <b>S4. IR spectra.....</b>            | <b>32</b> |

# S1. EPR spectra

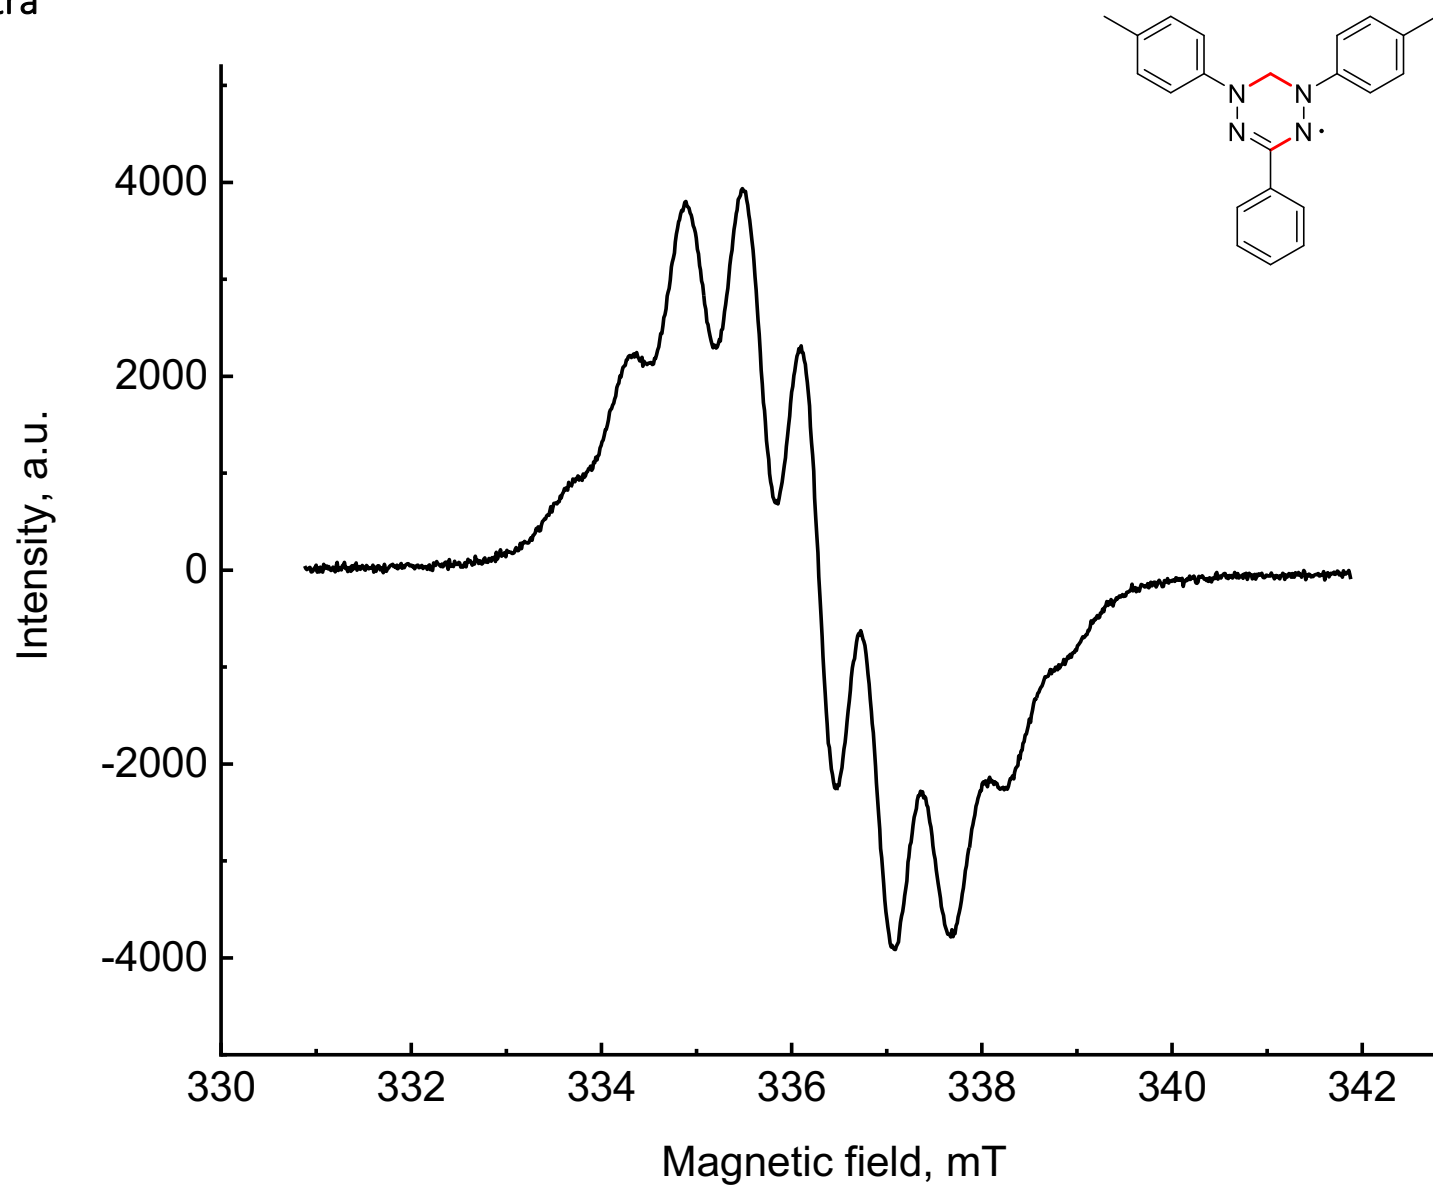

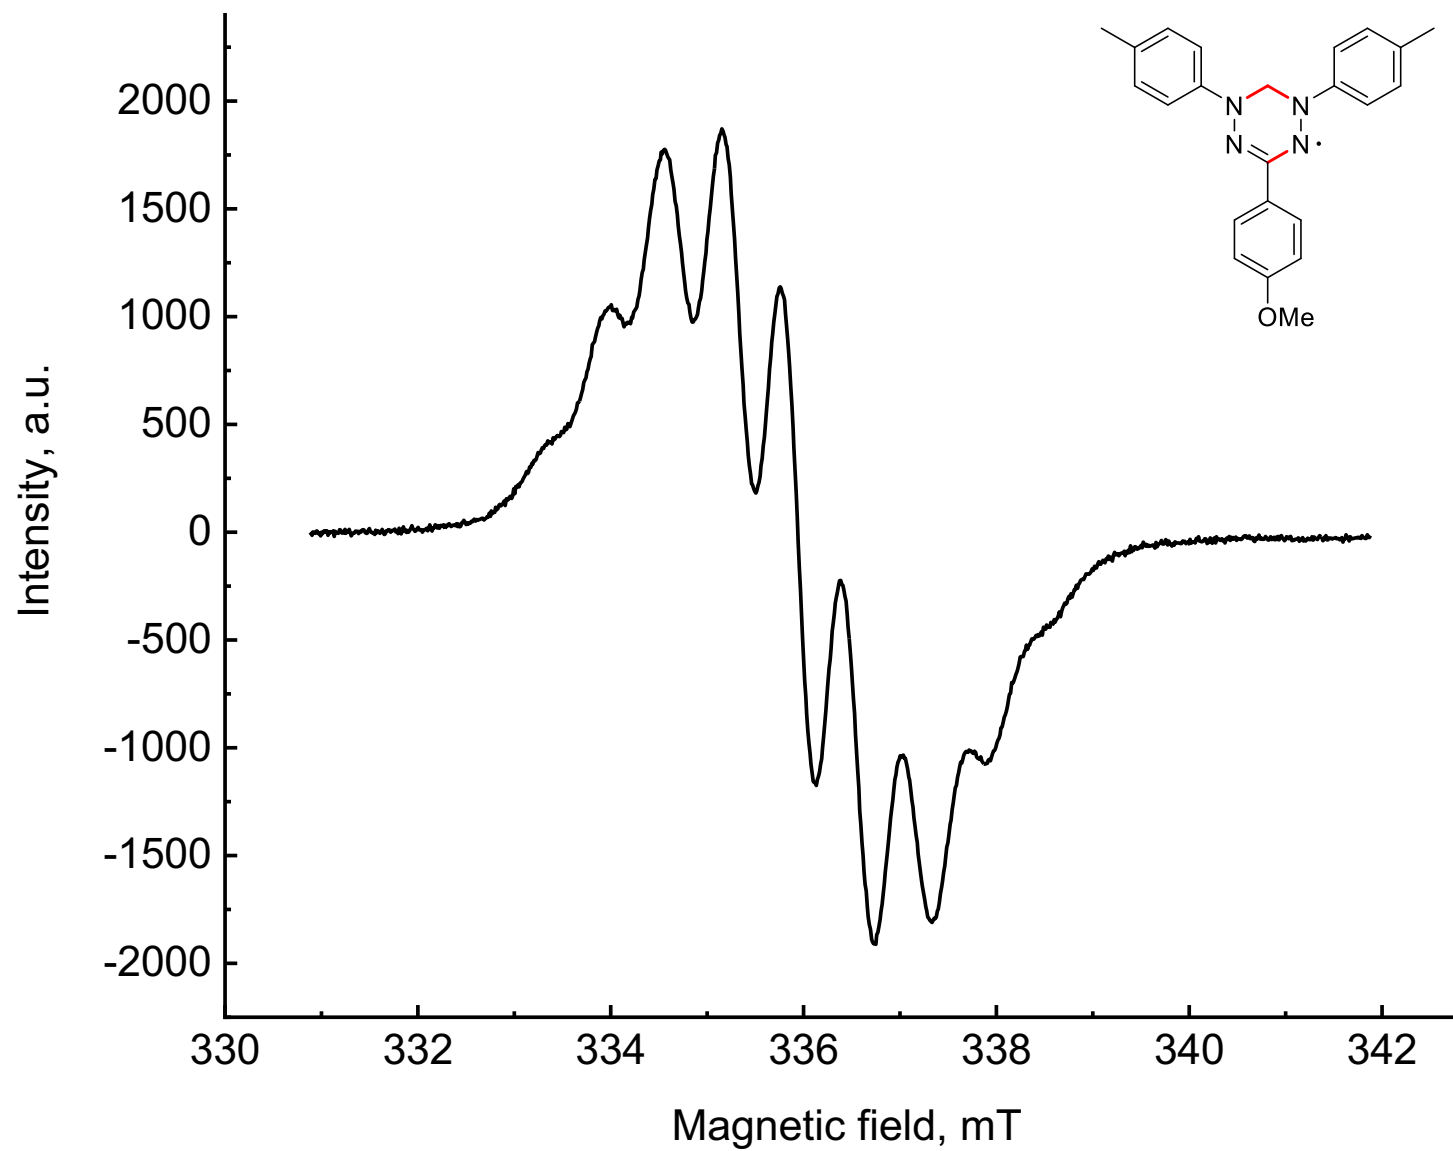

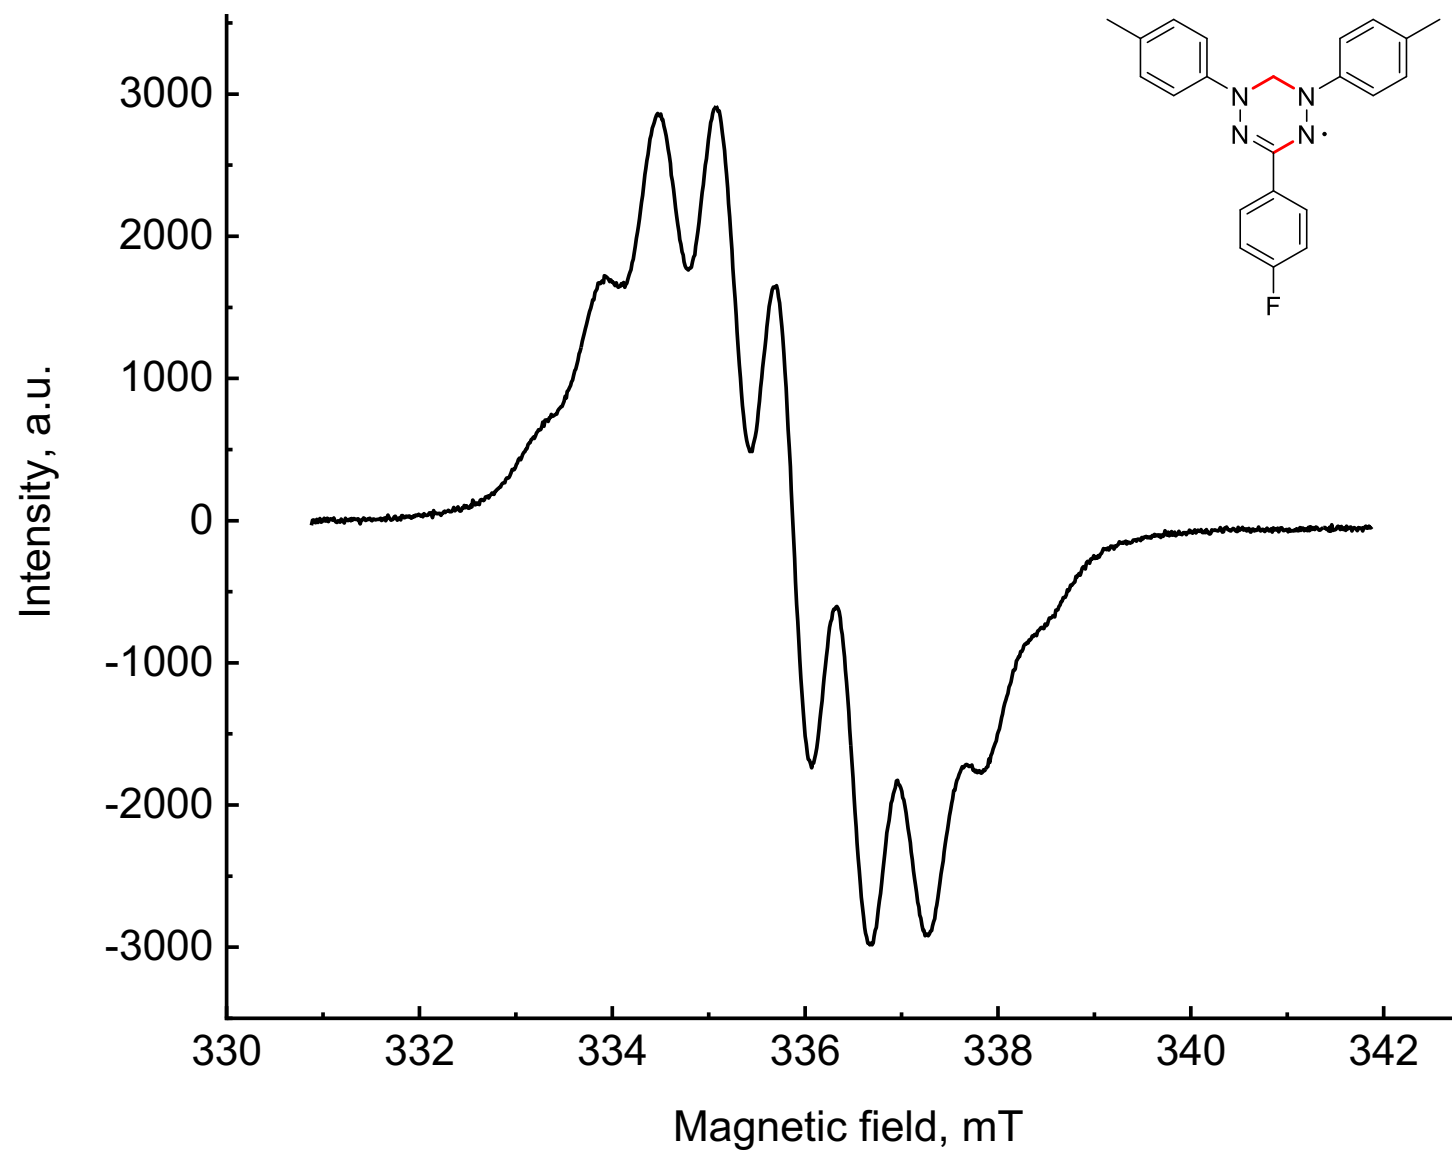

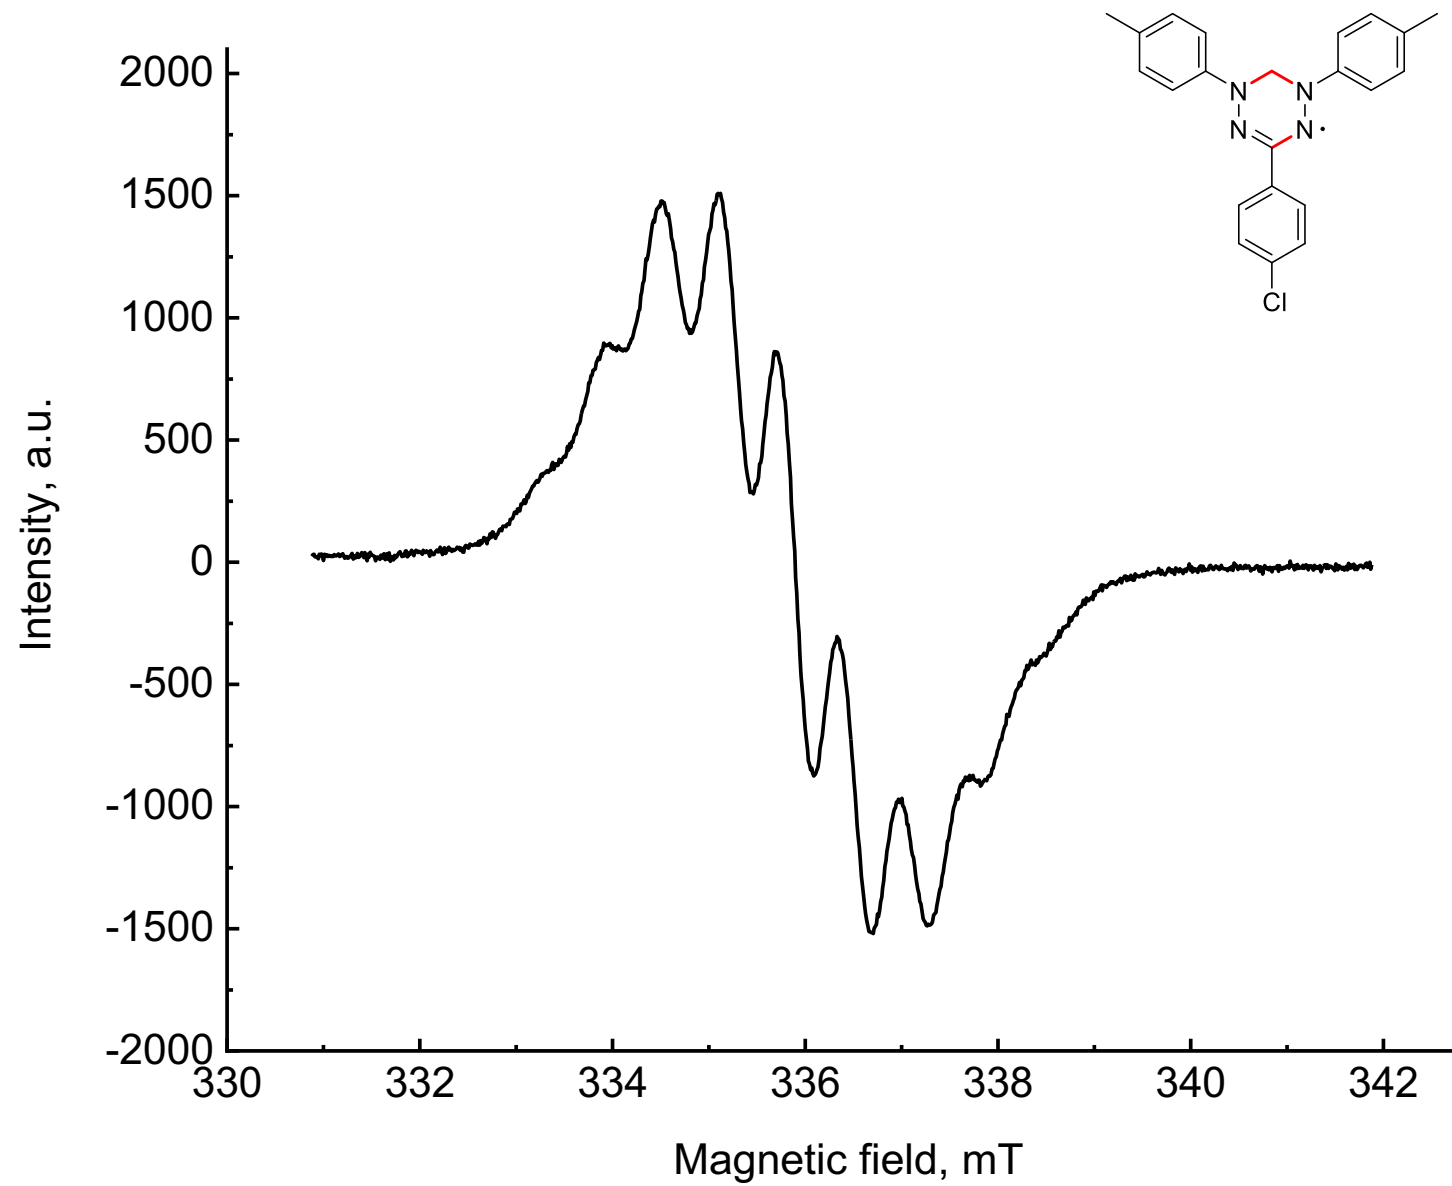

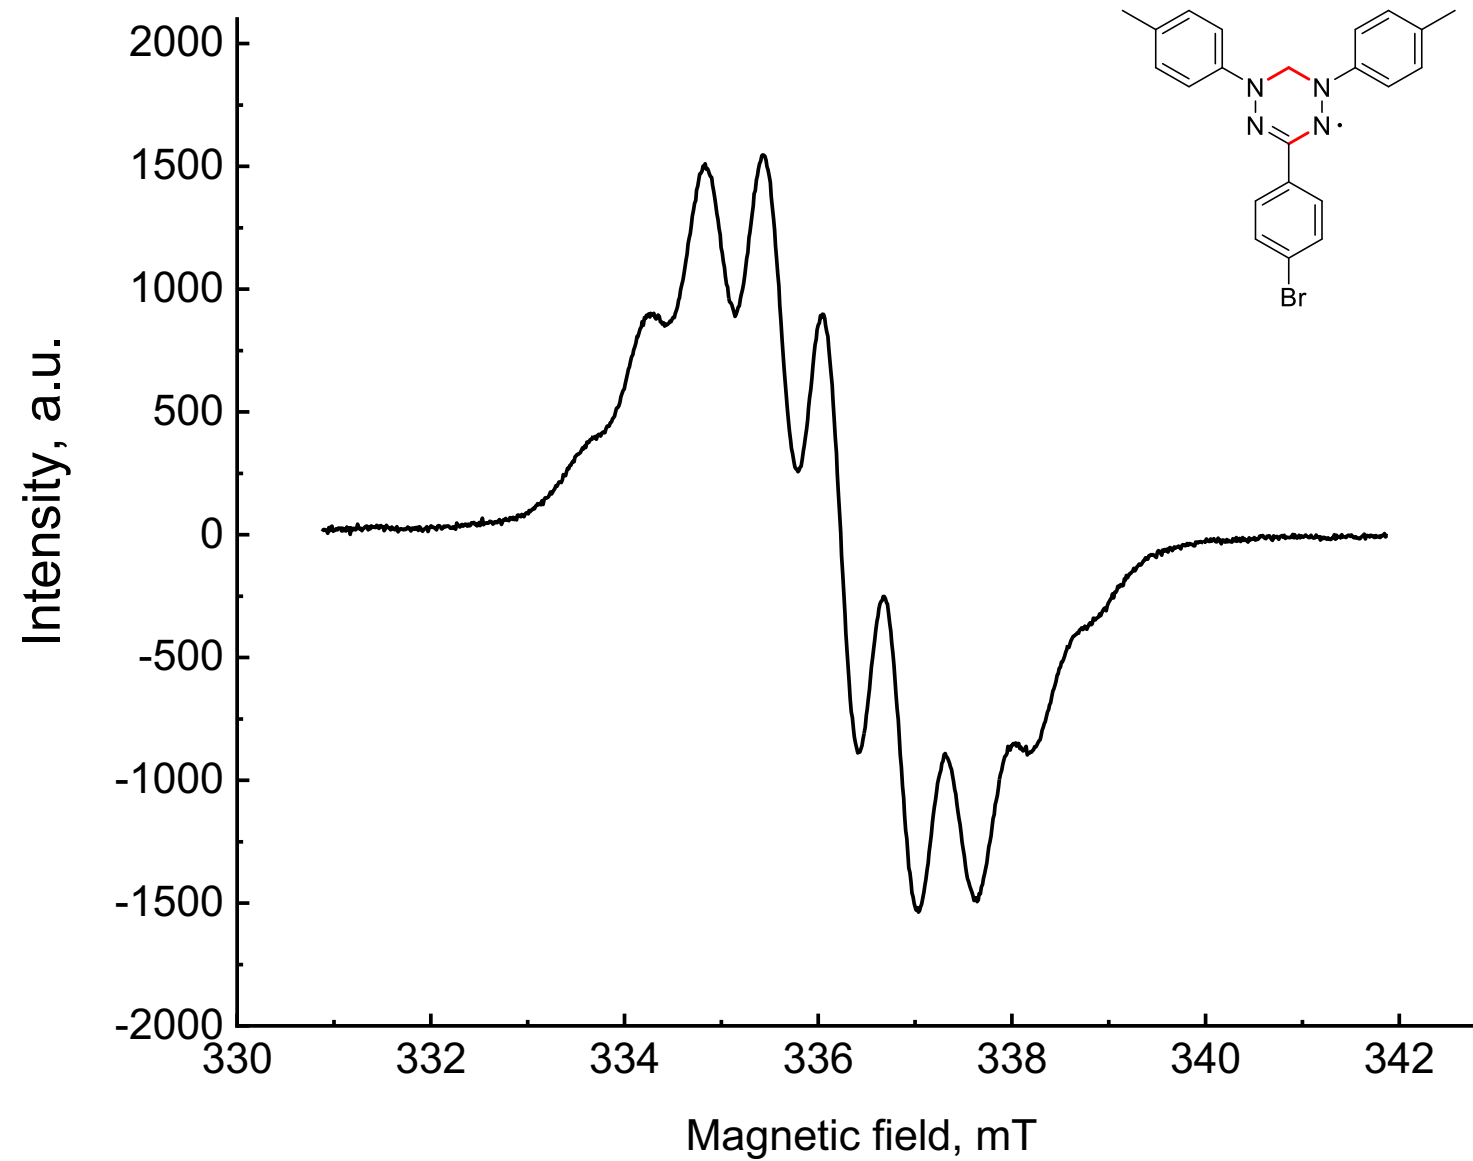

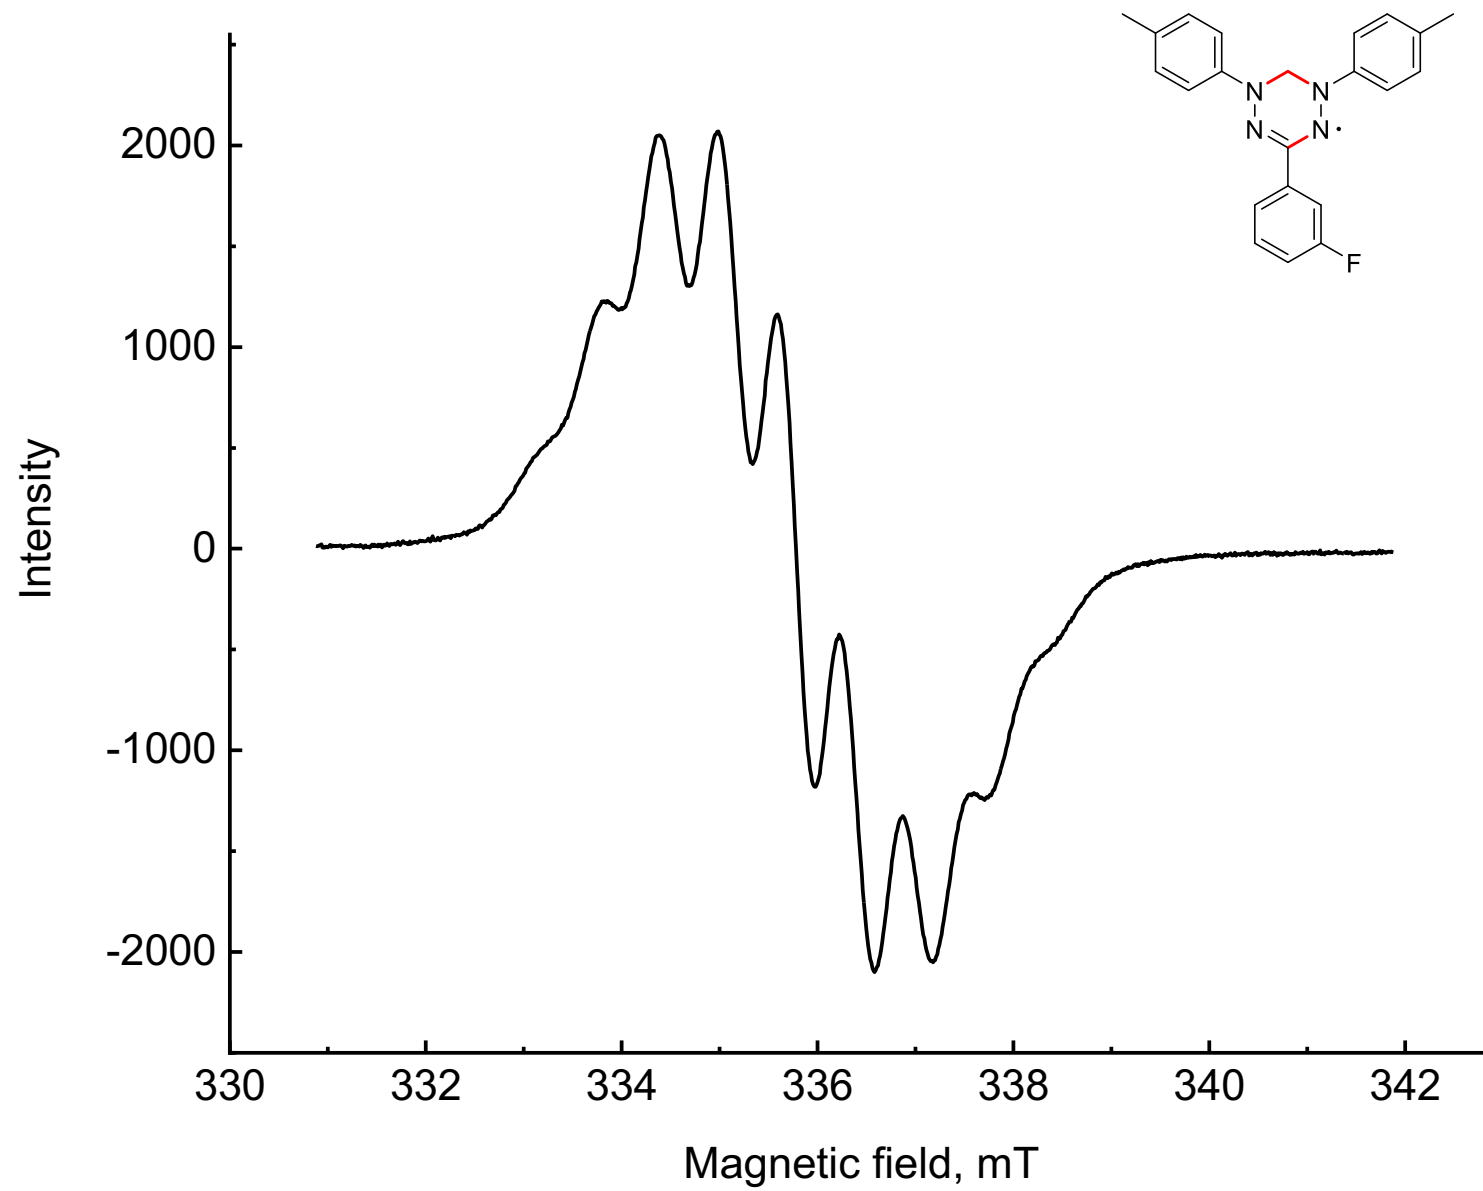

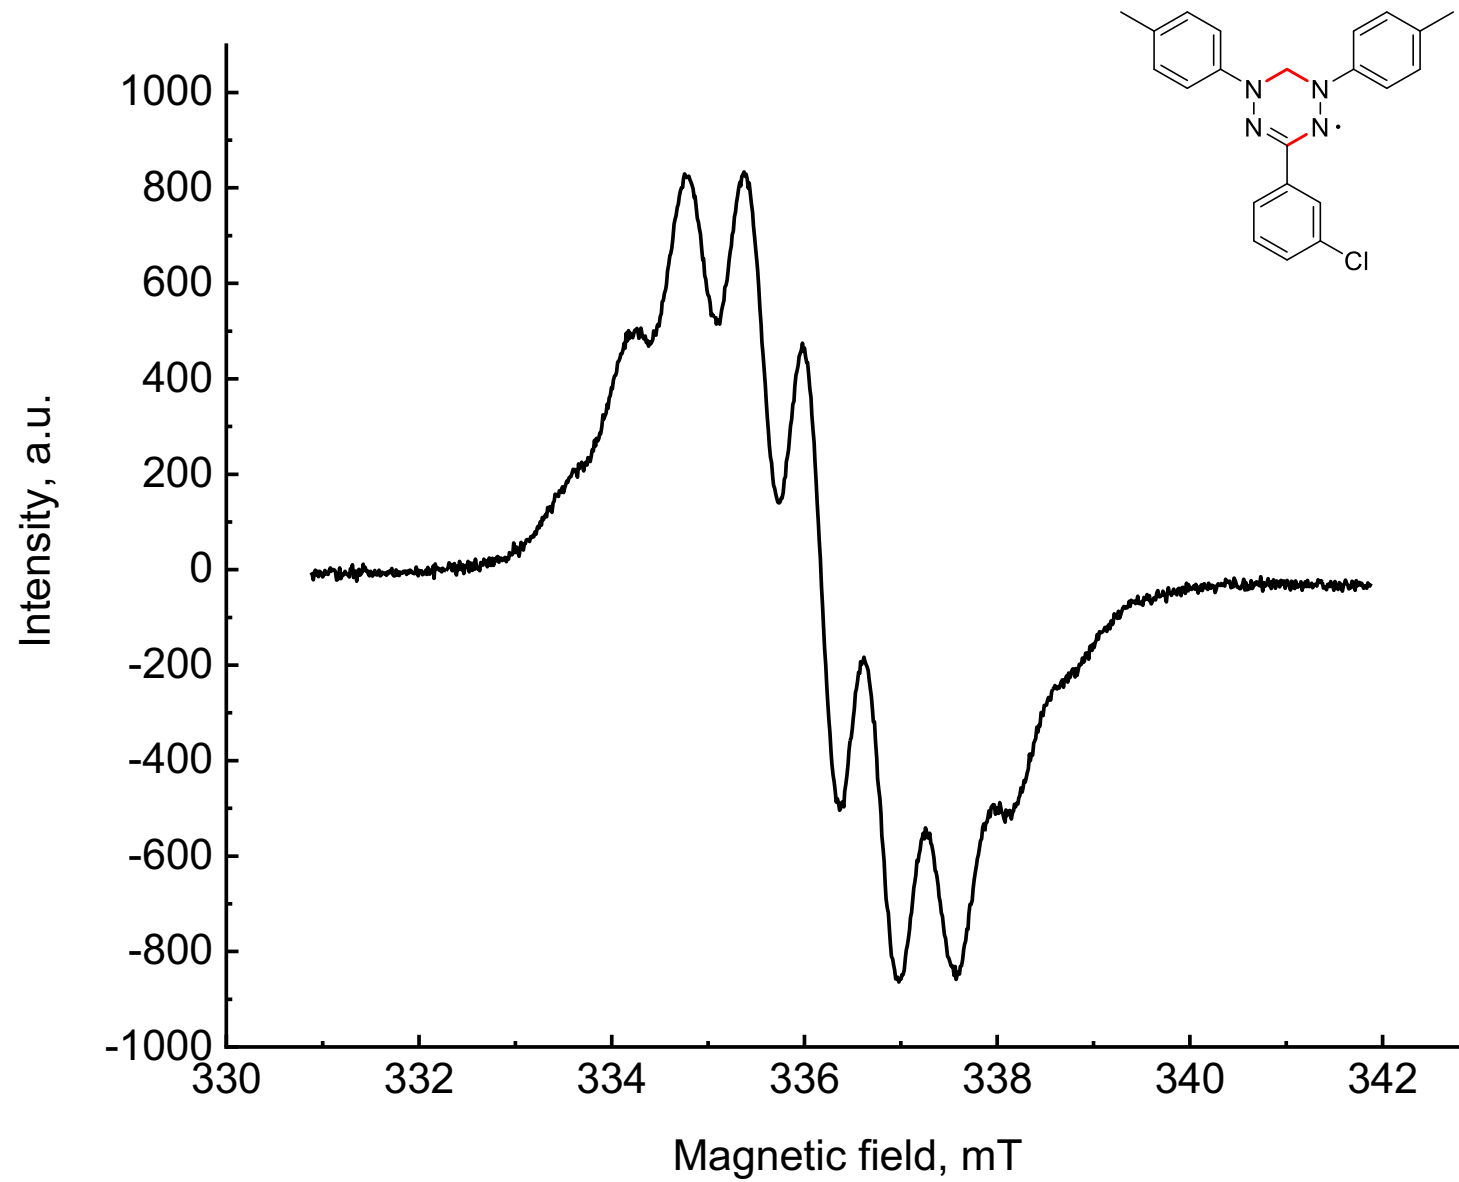



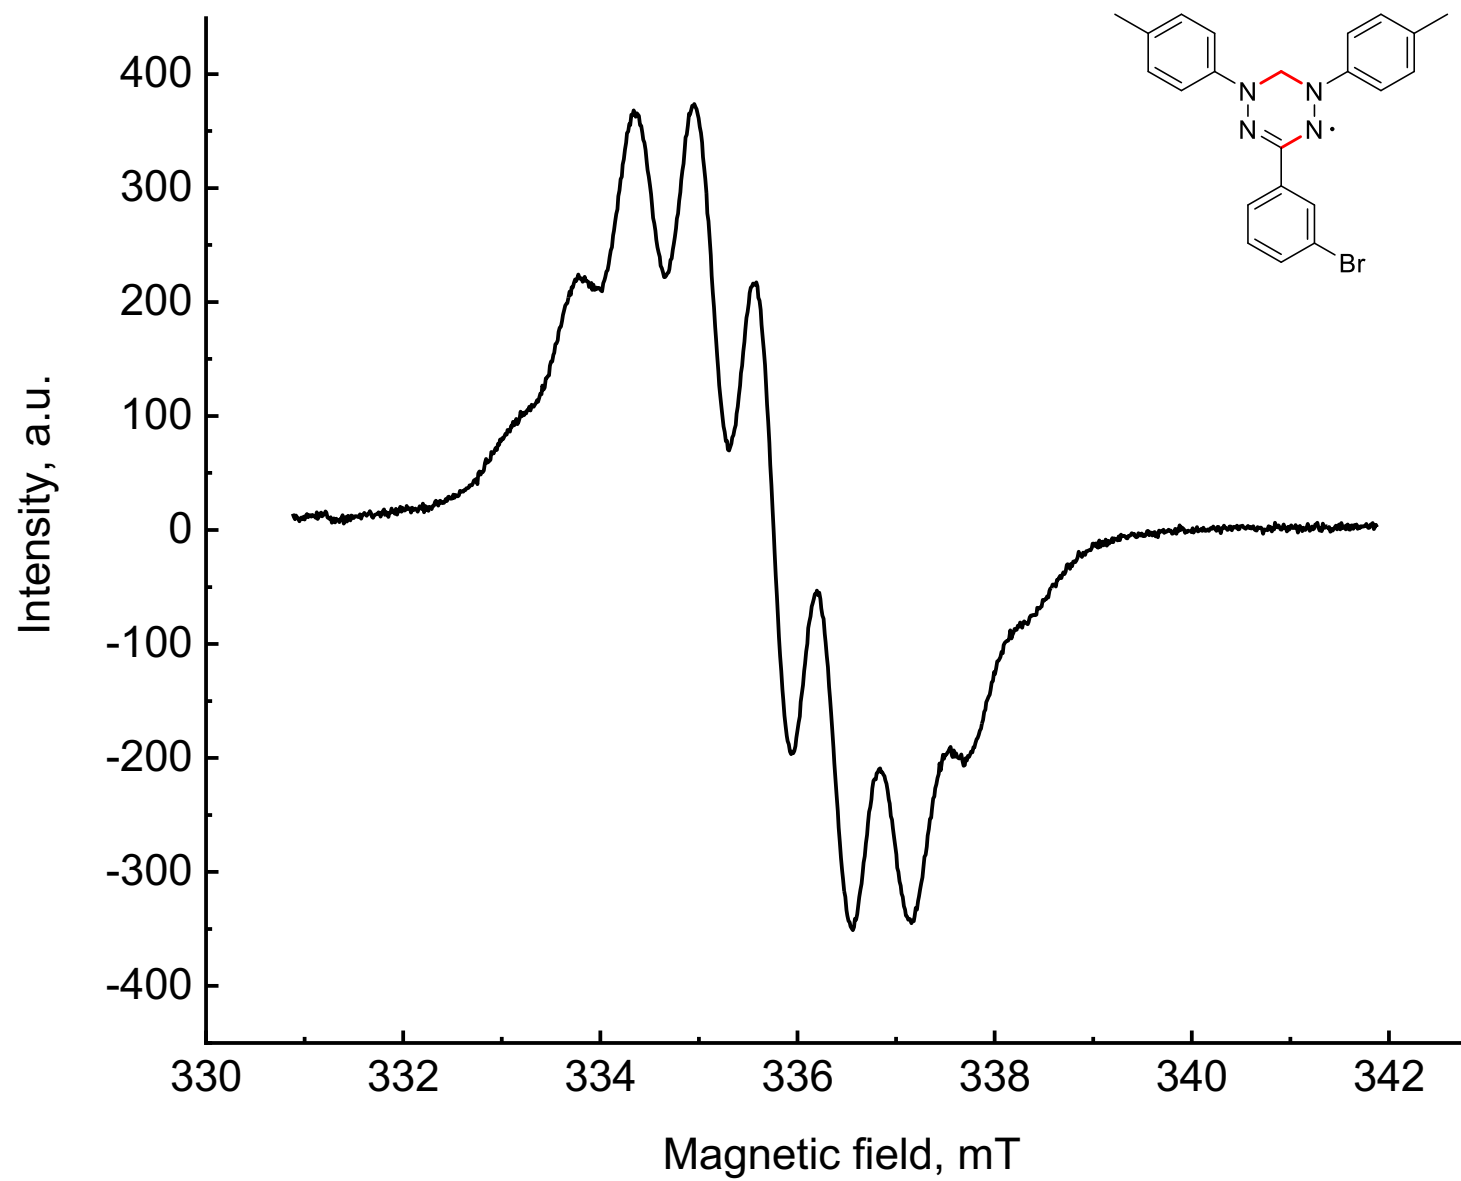

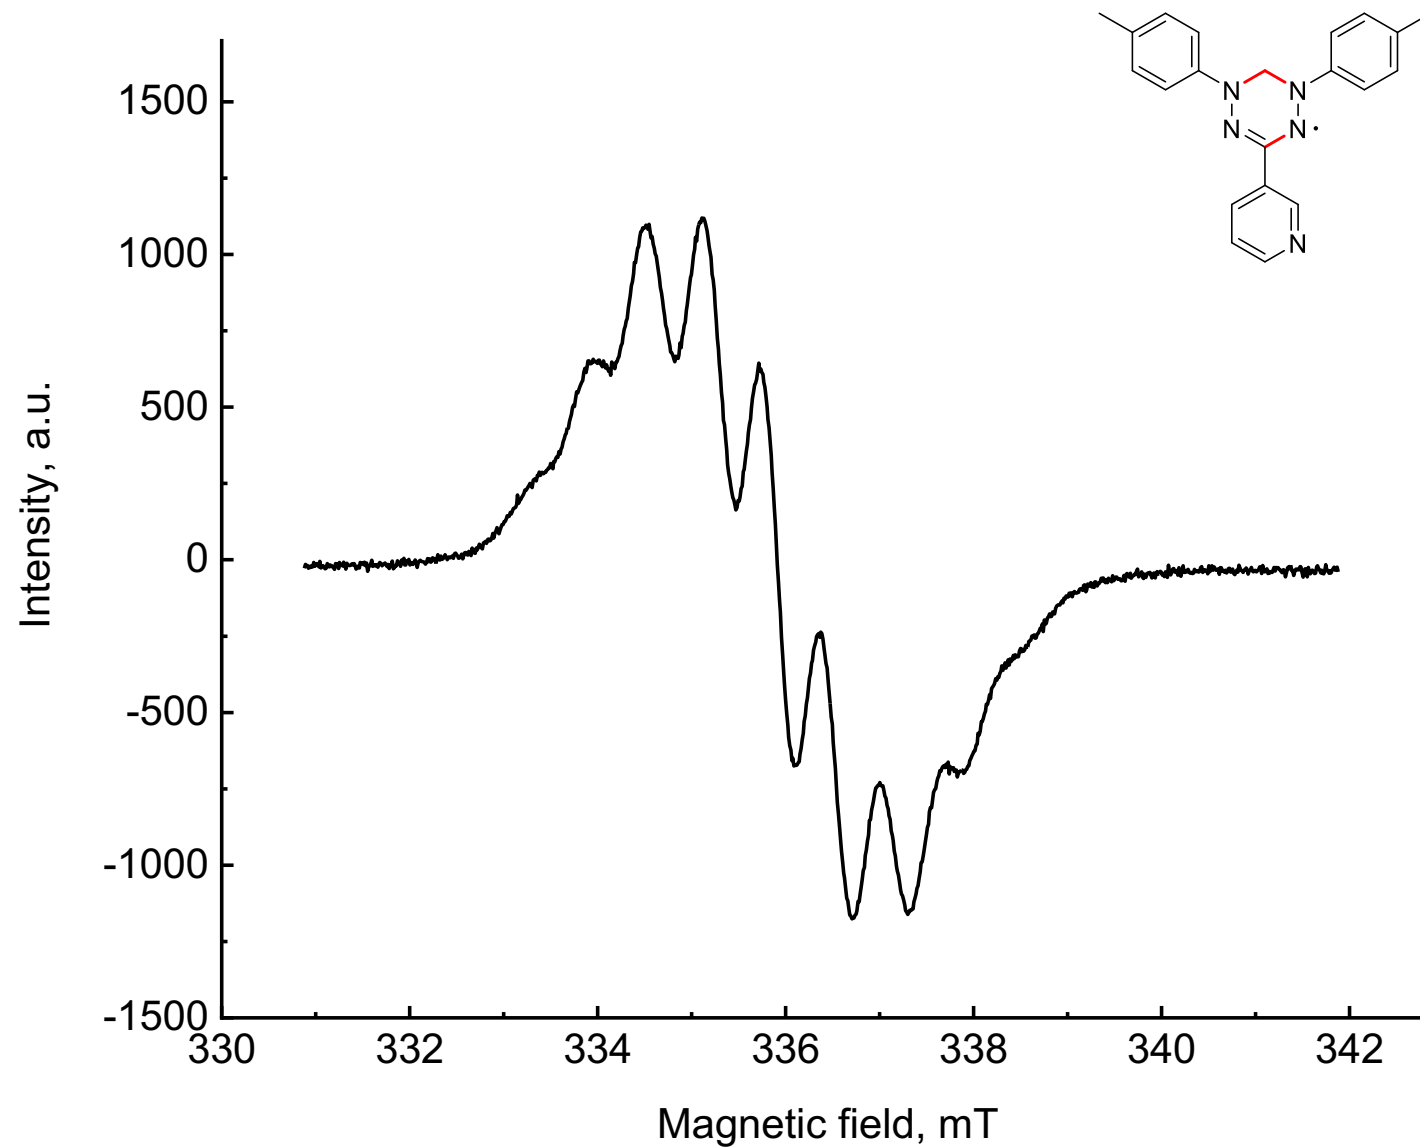

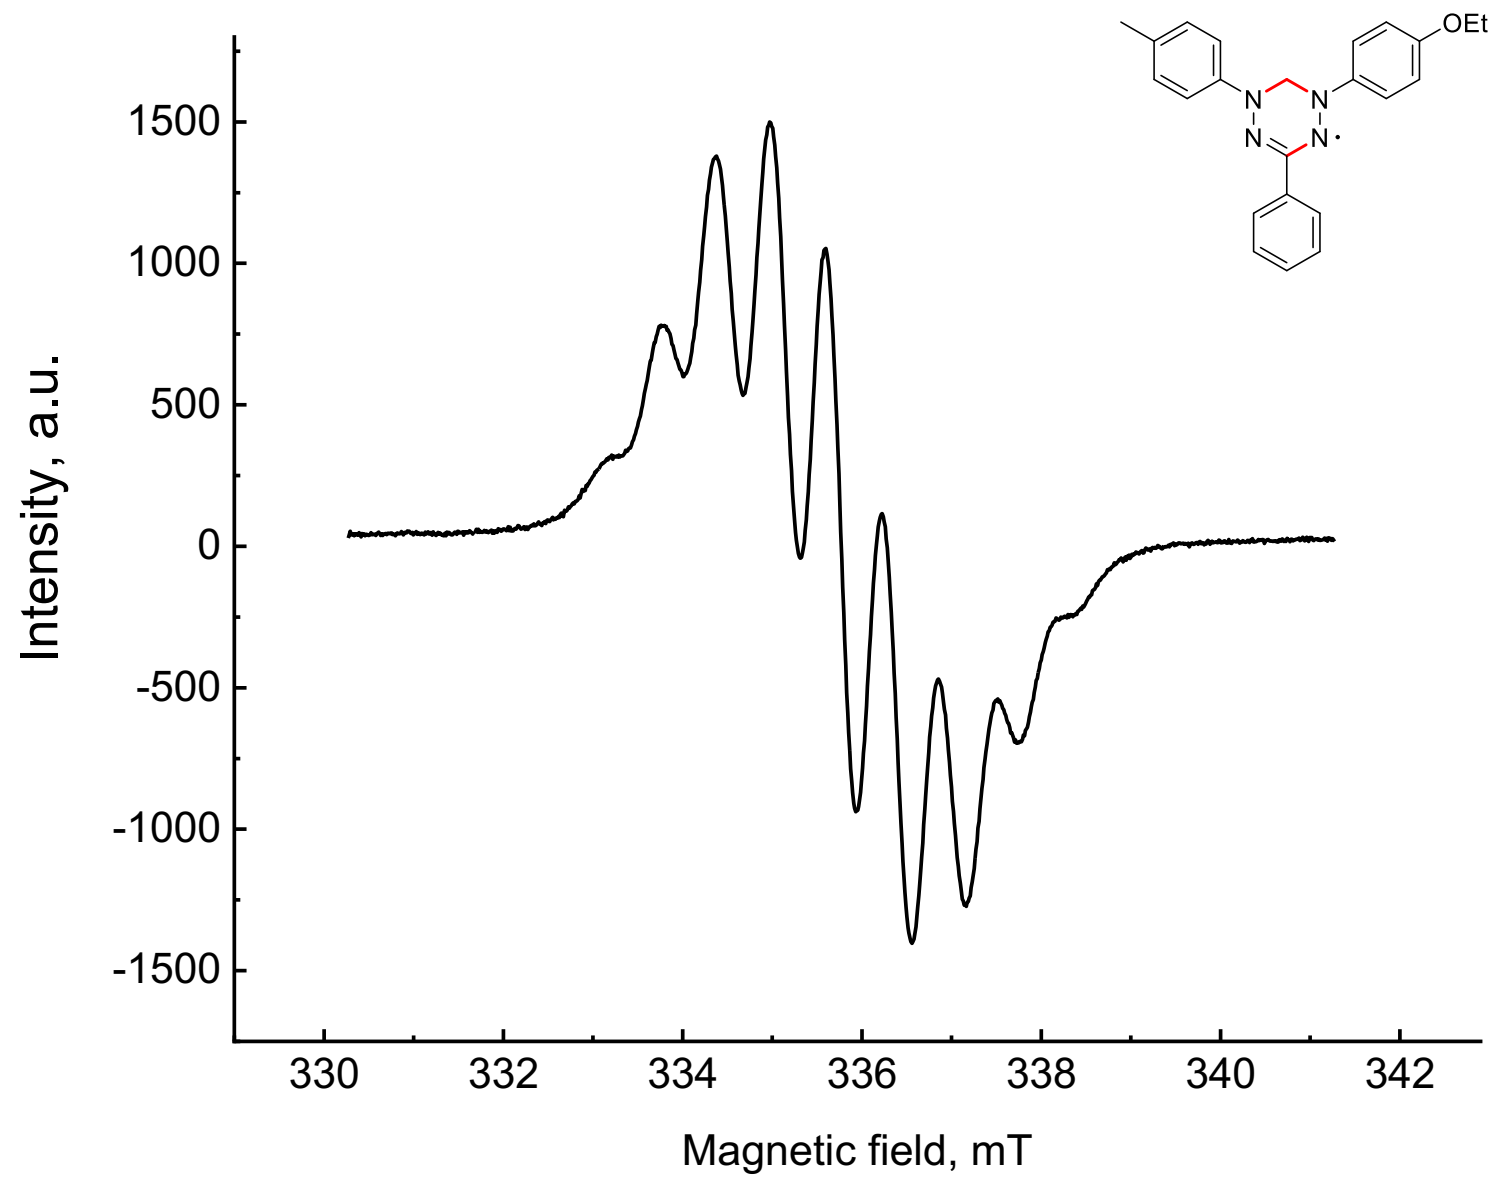

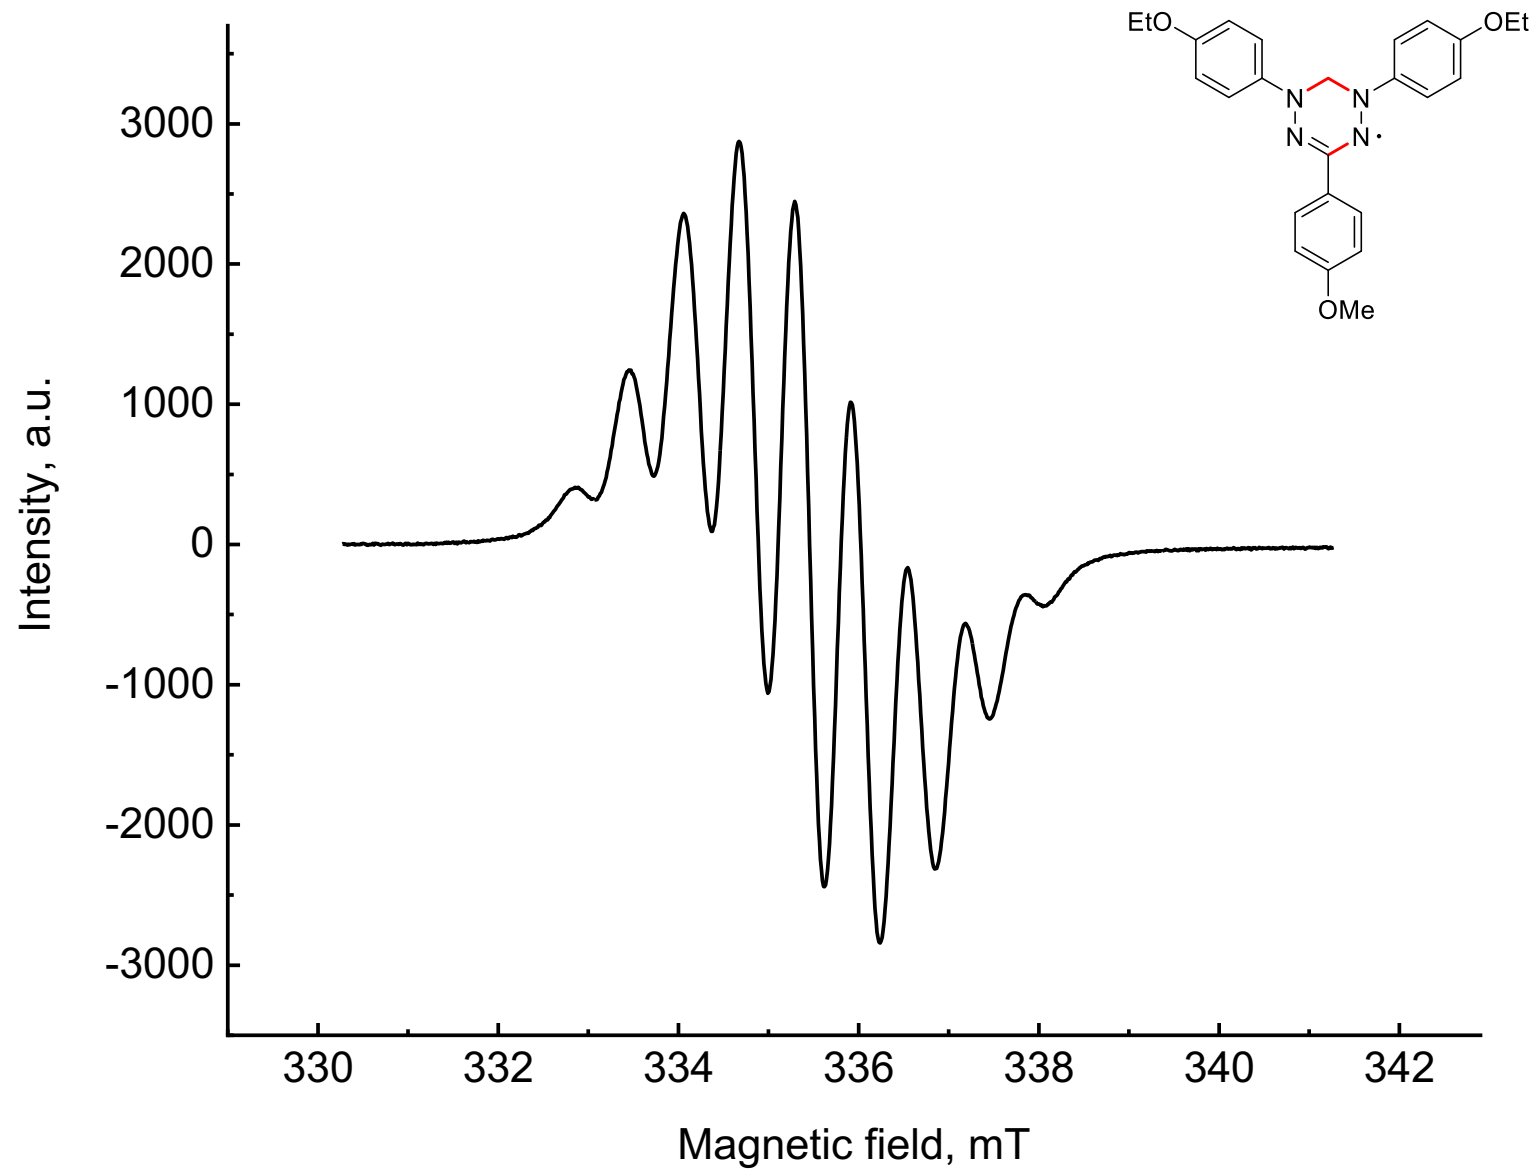

## S2. UV-Vis spectra

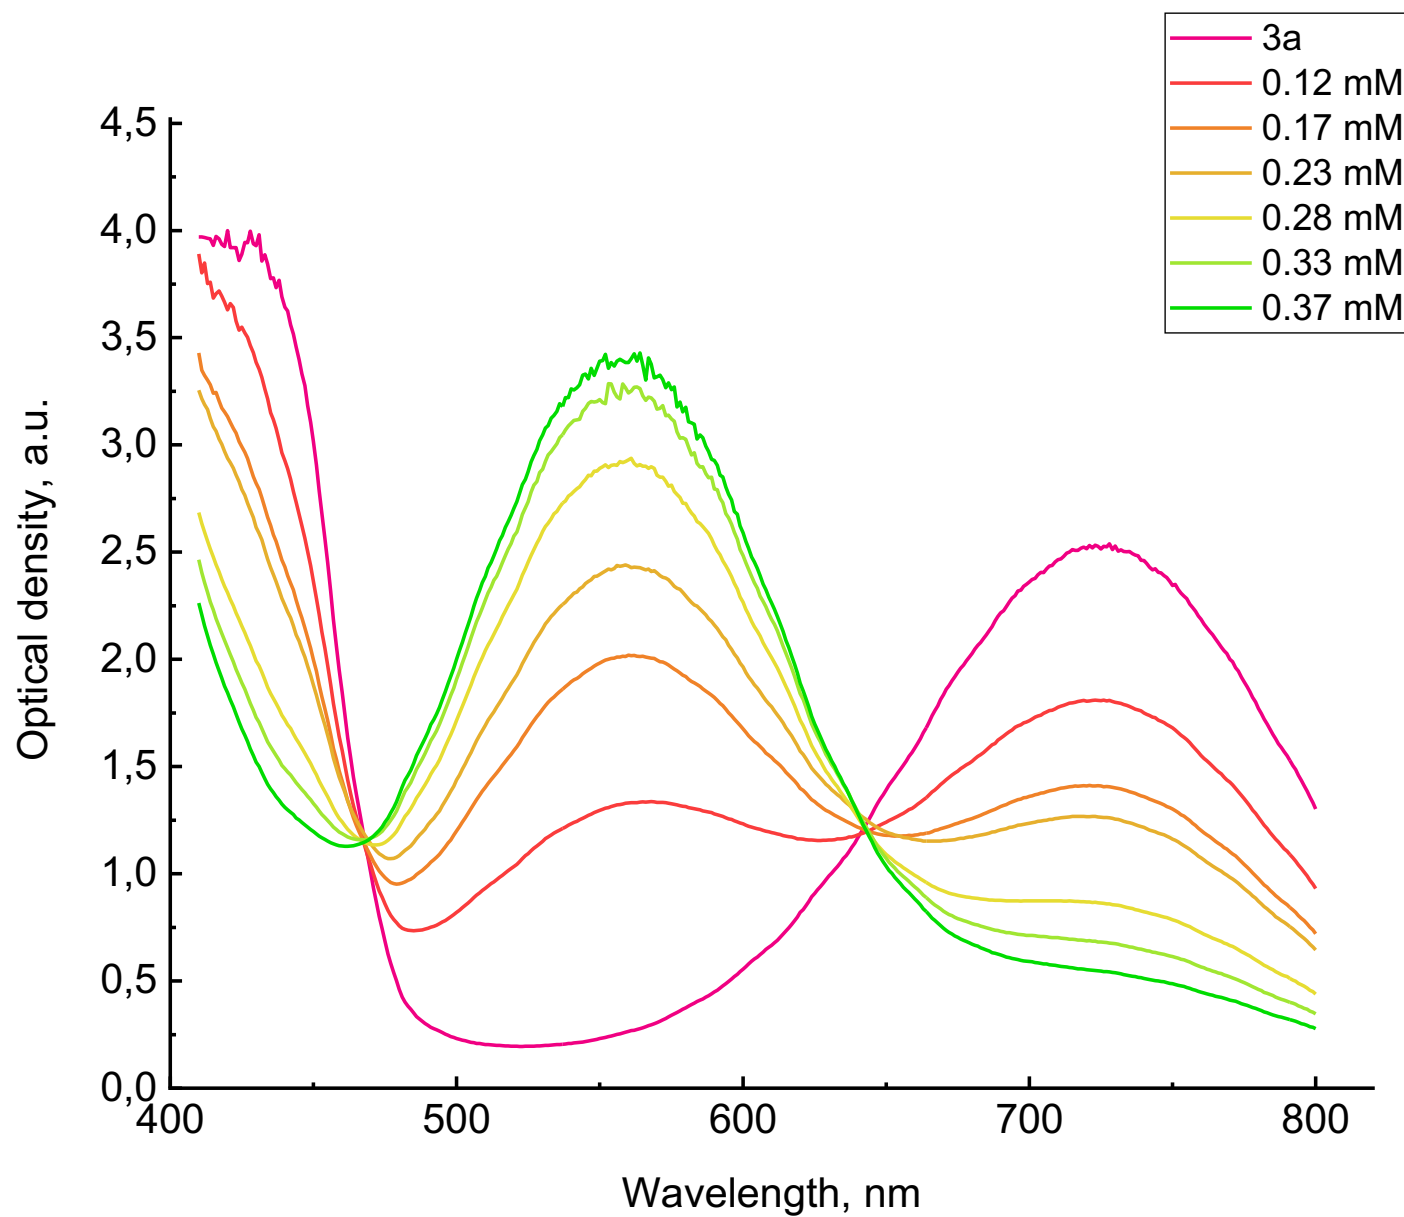

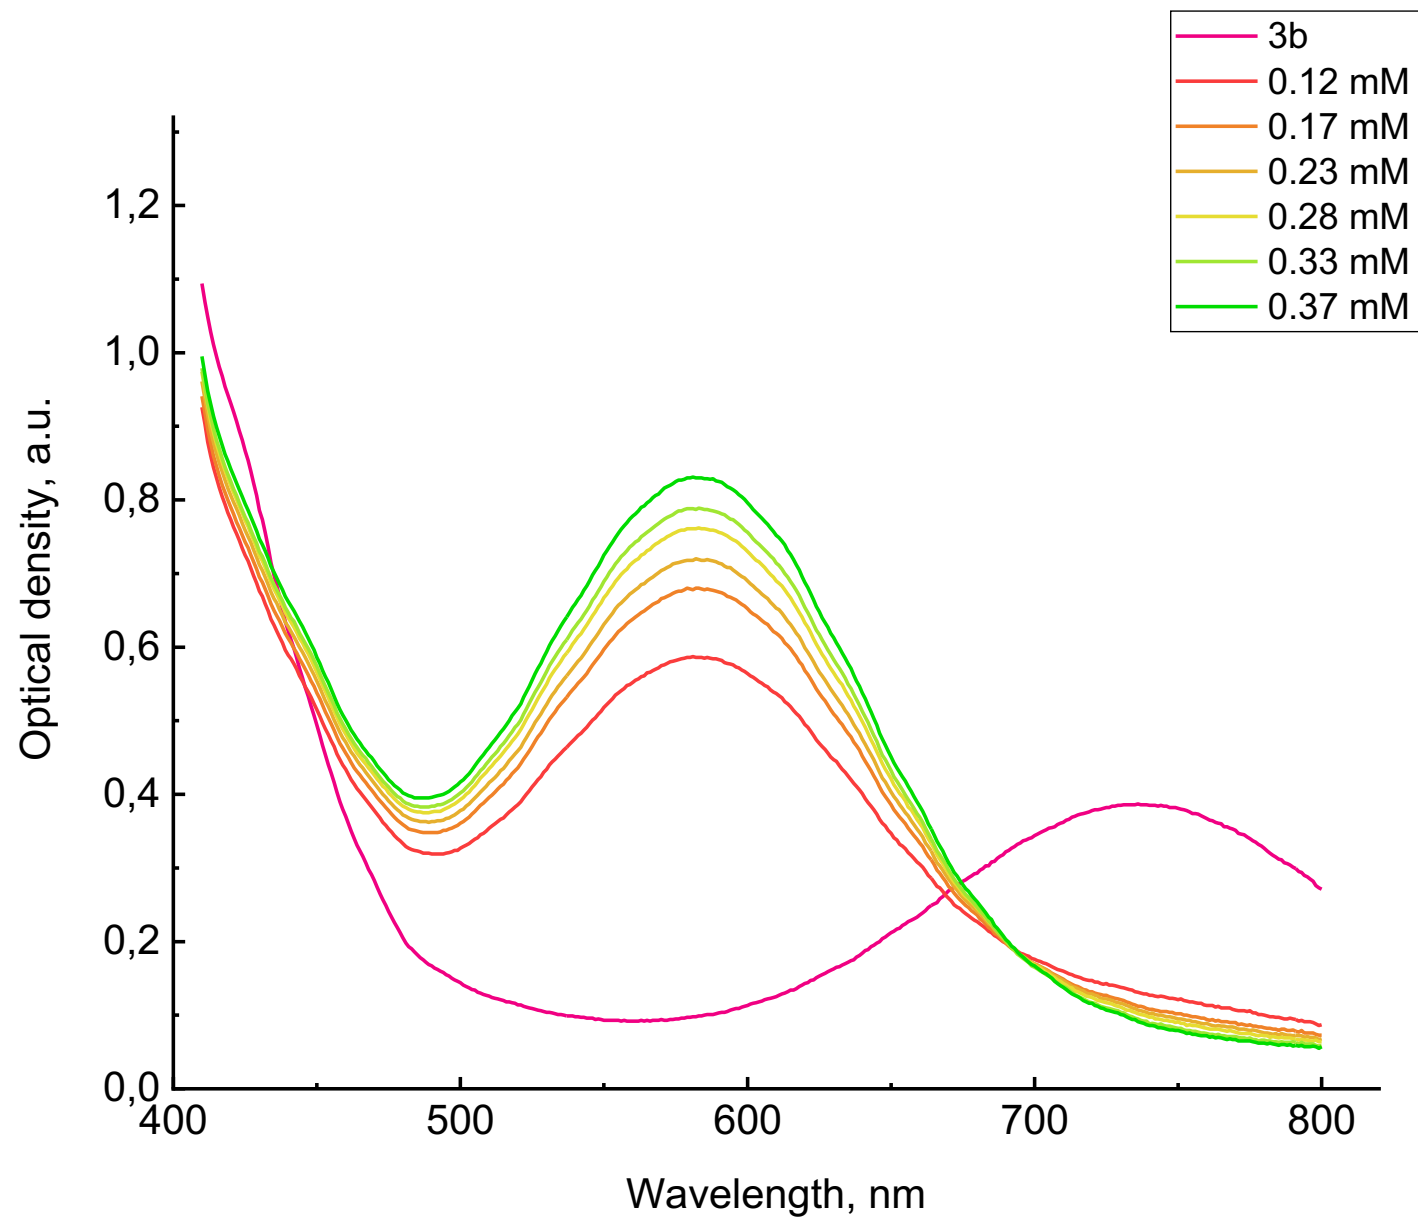

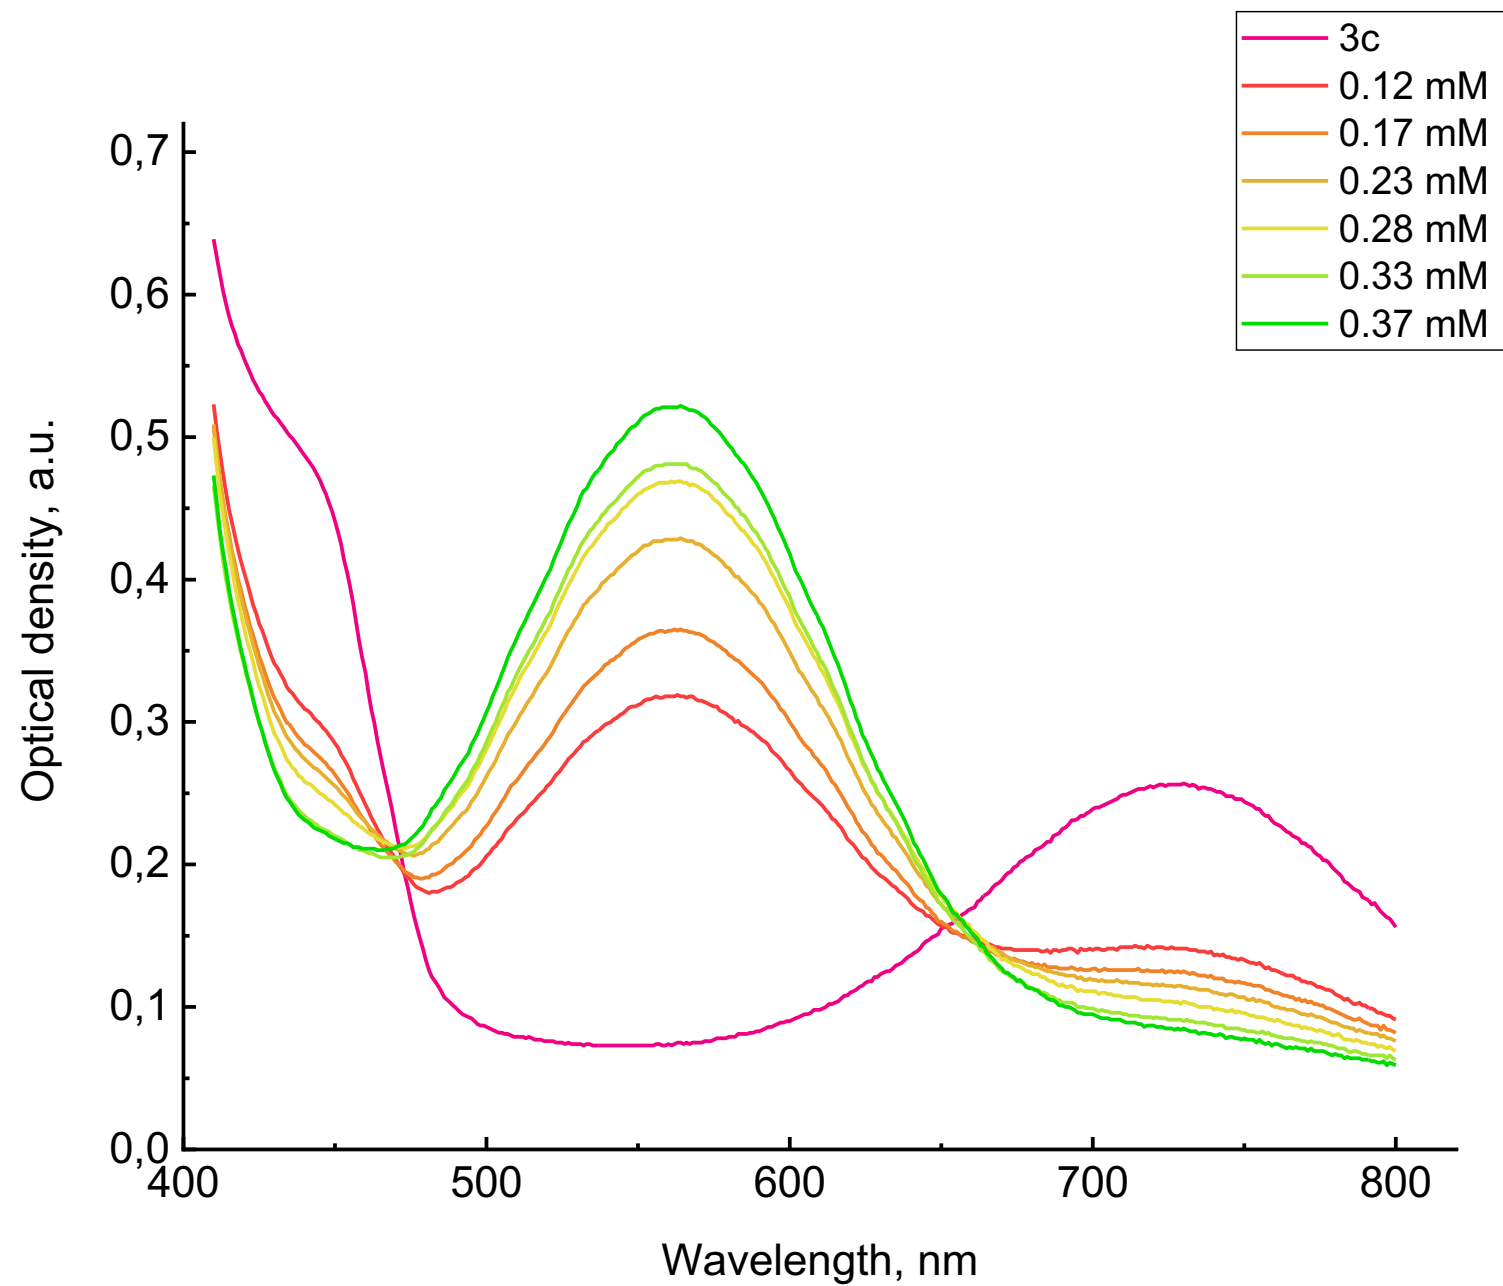

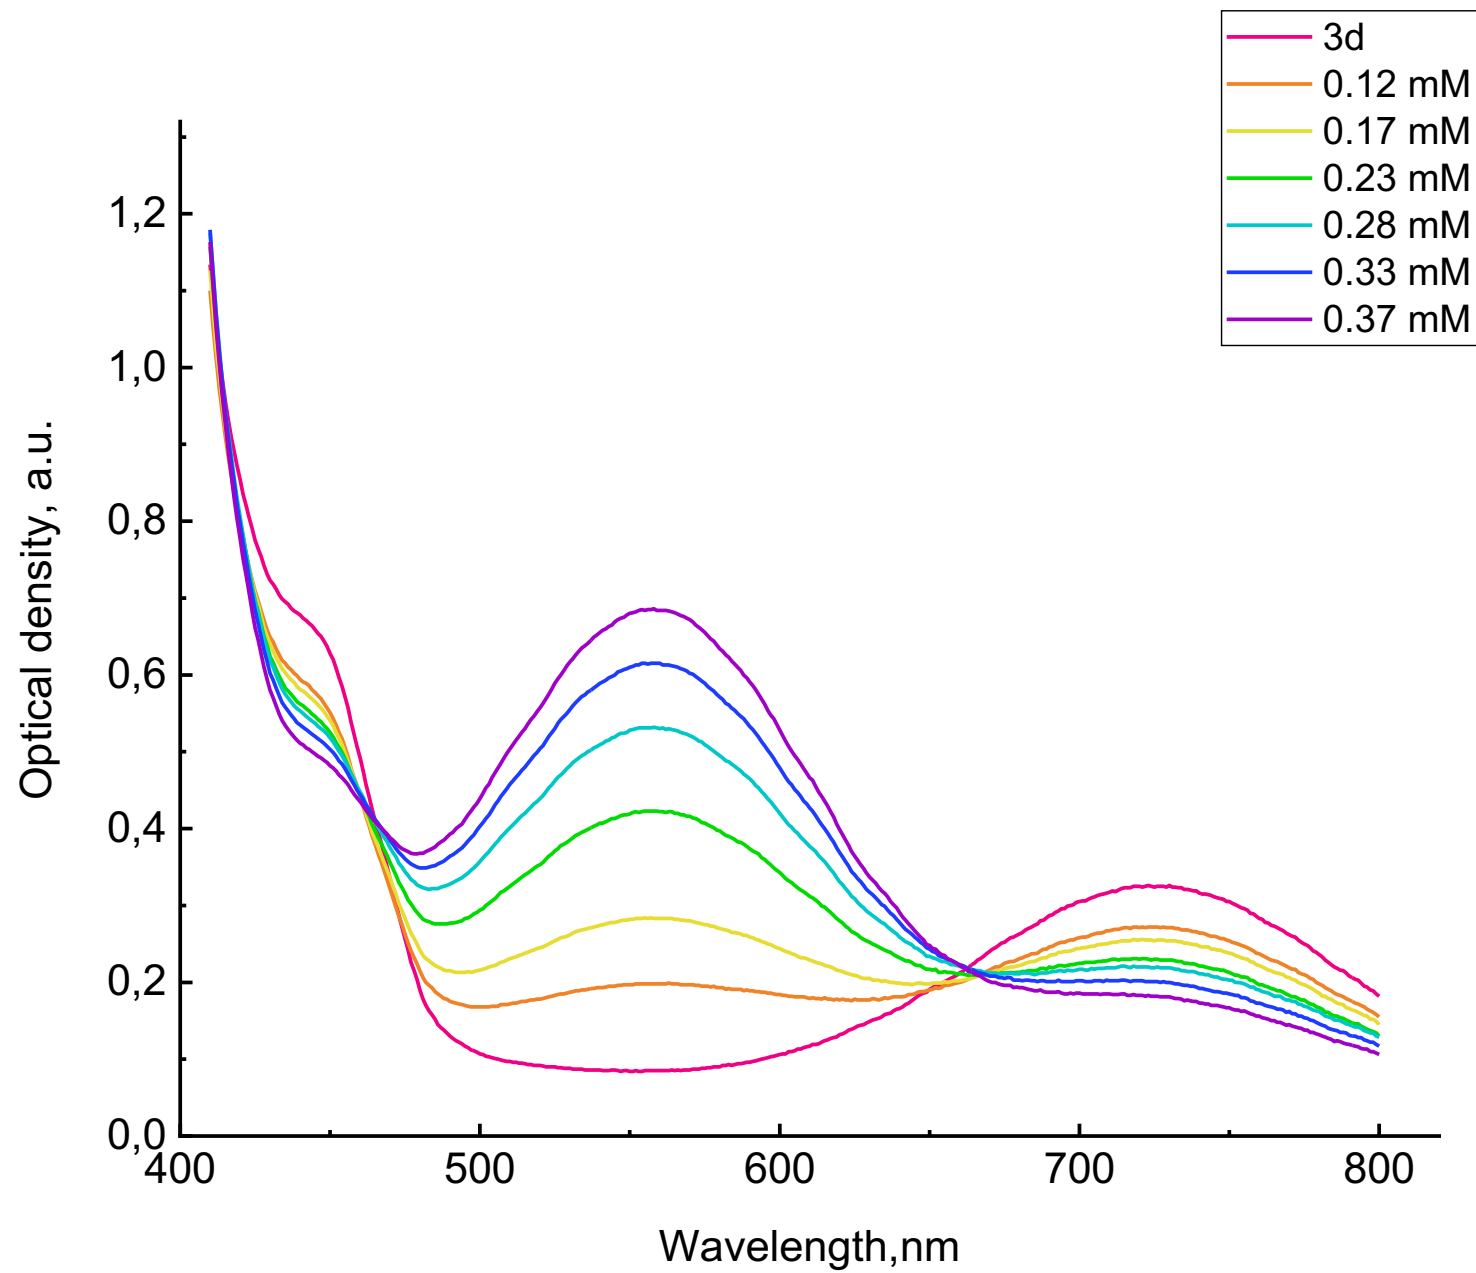



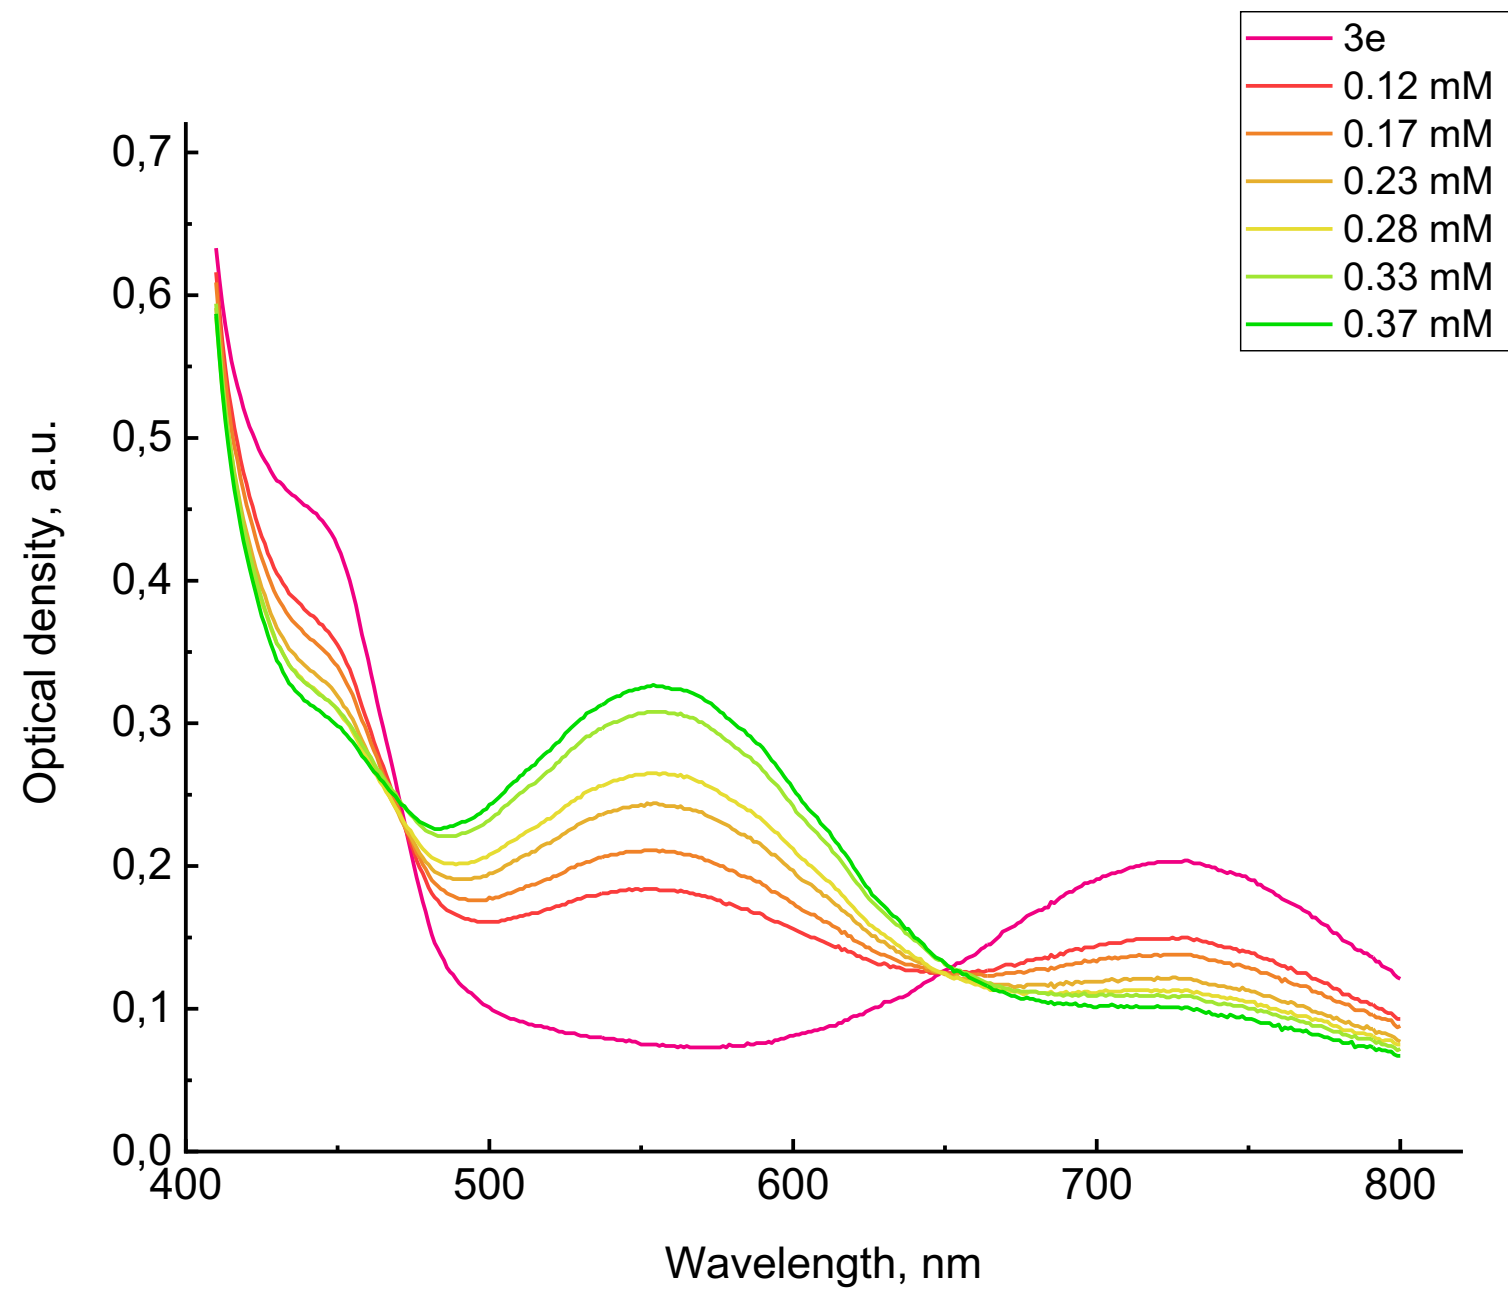

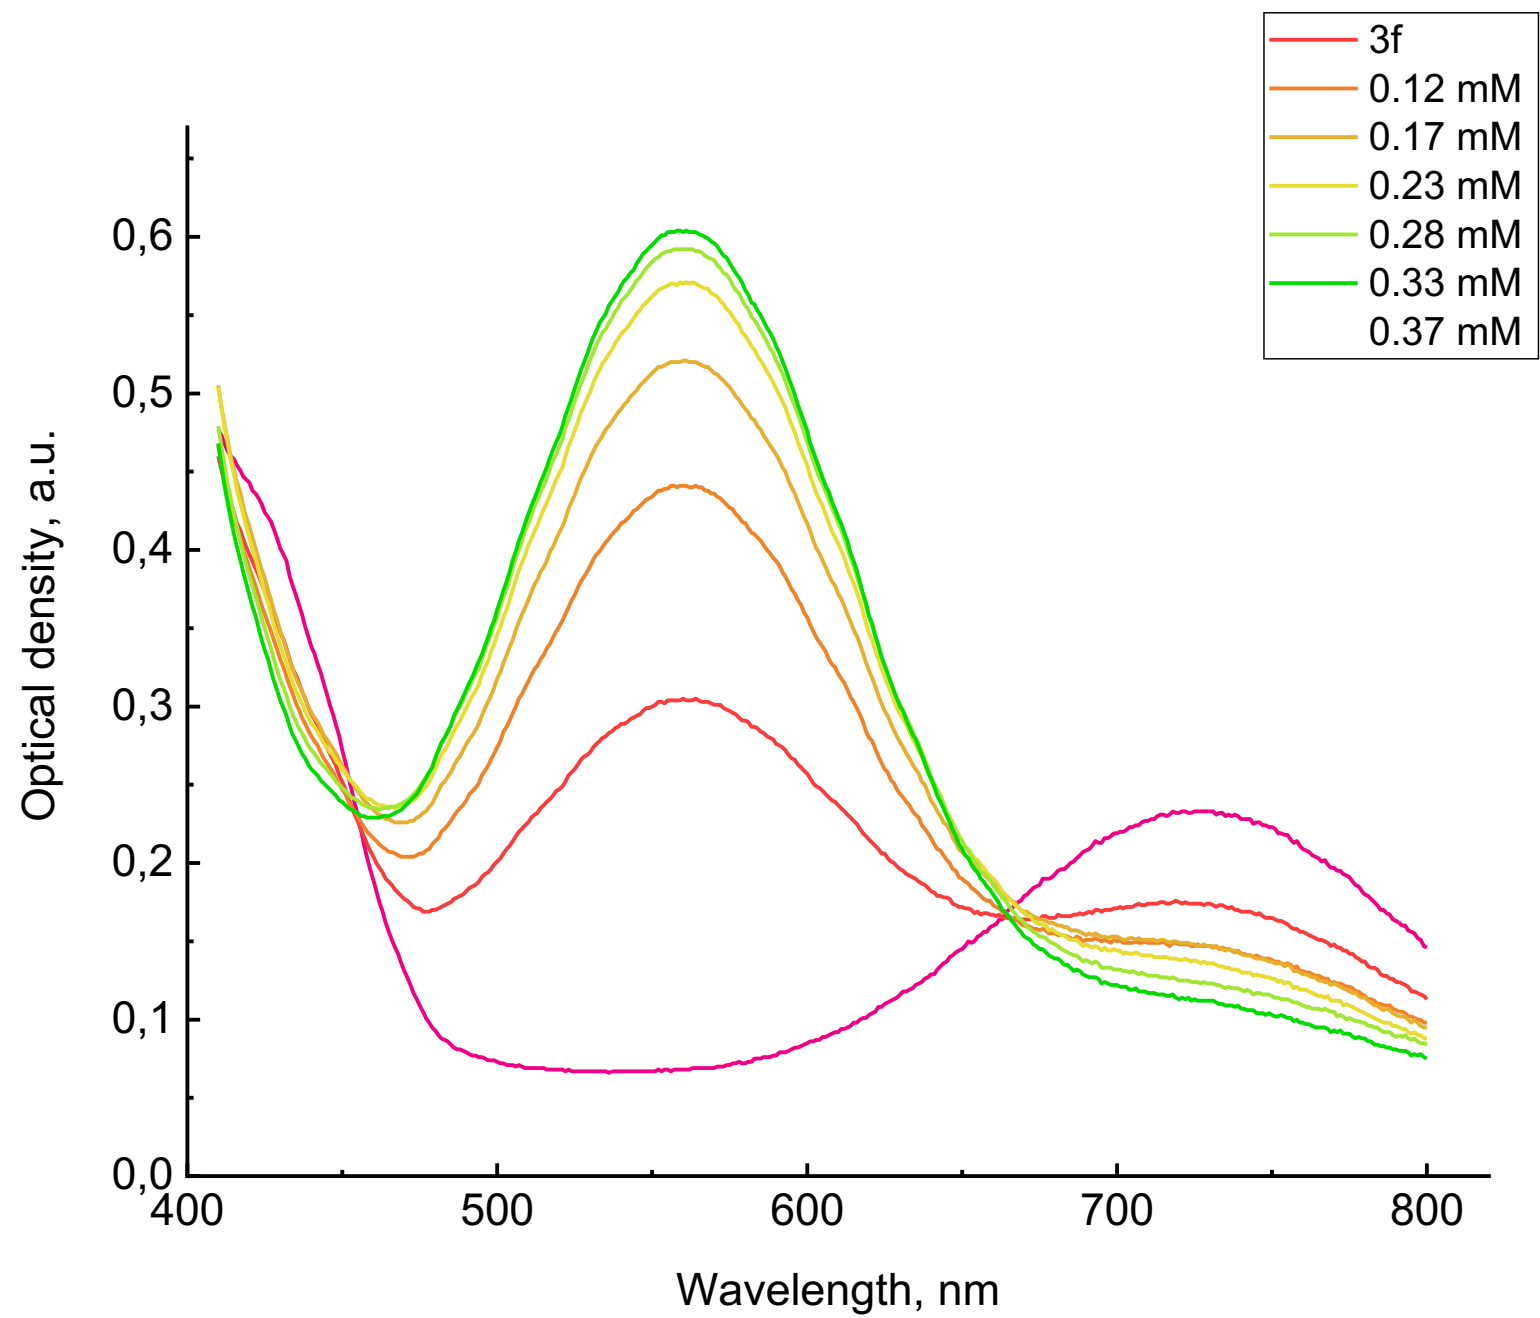

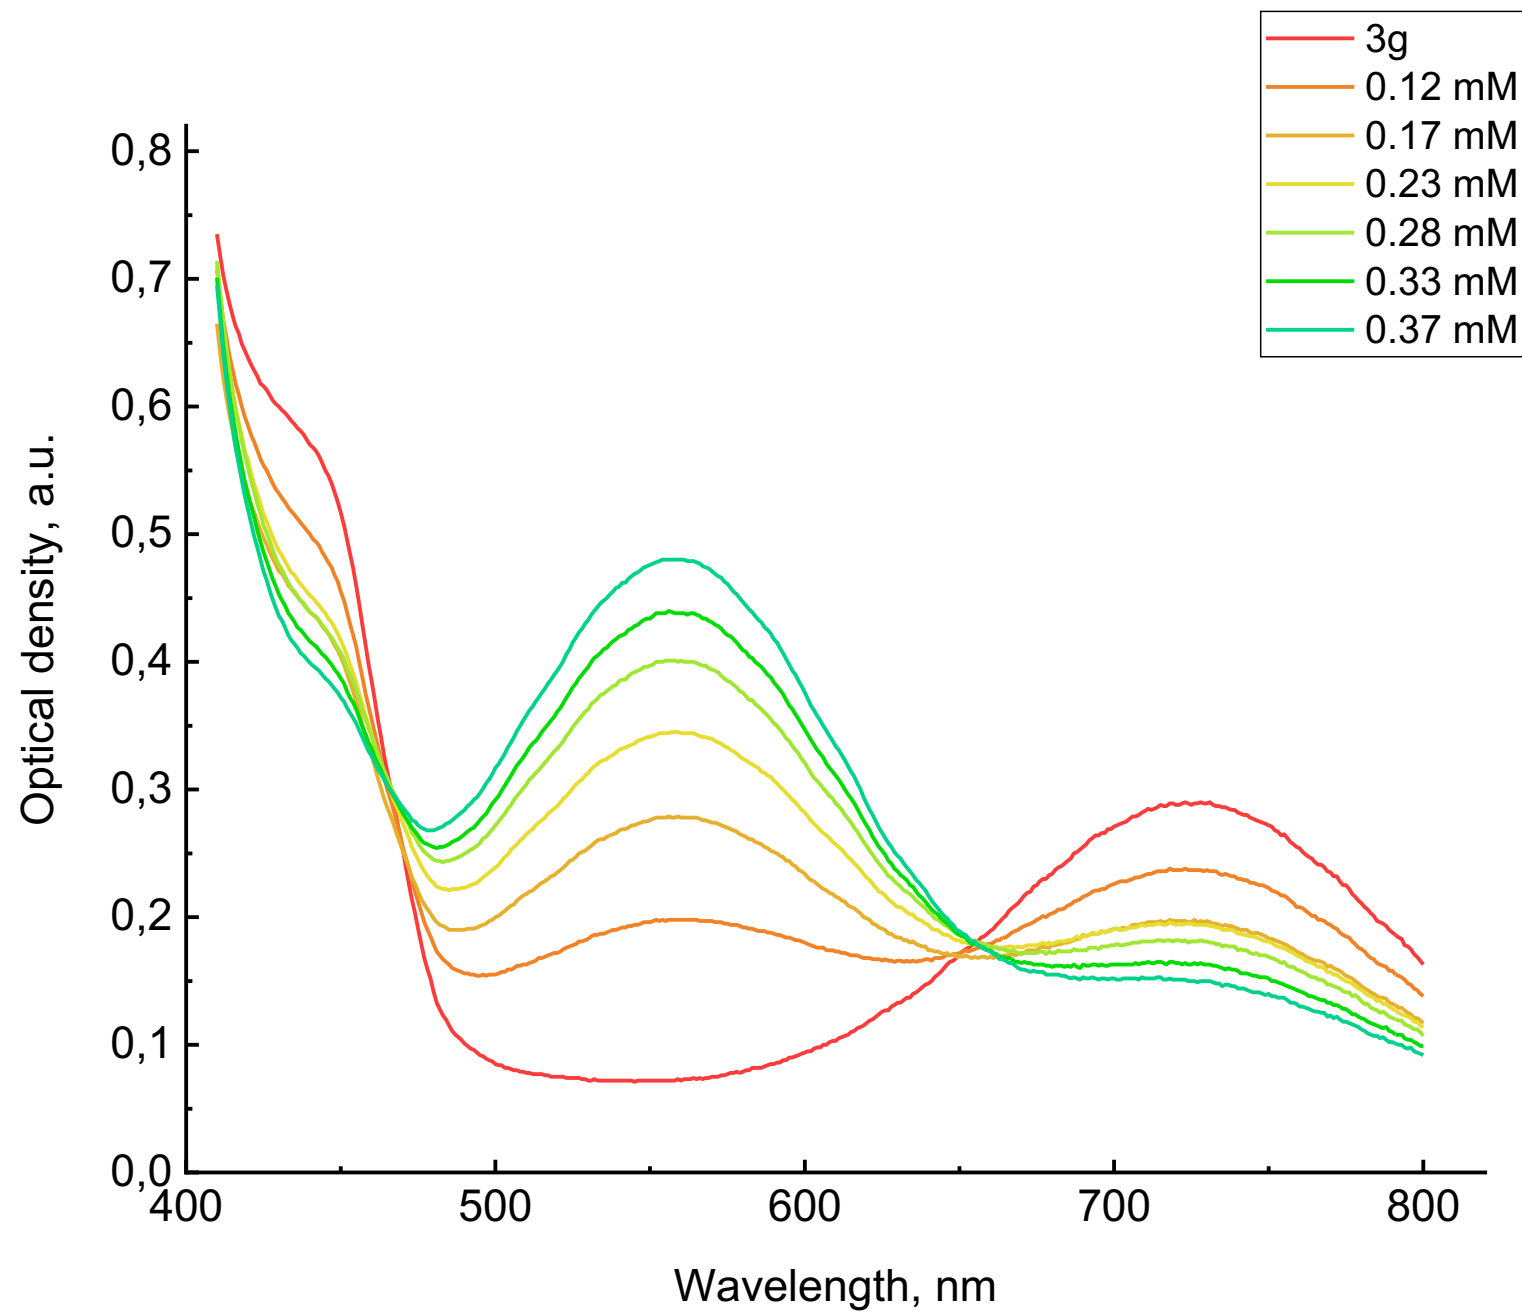

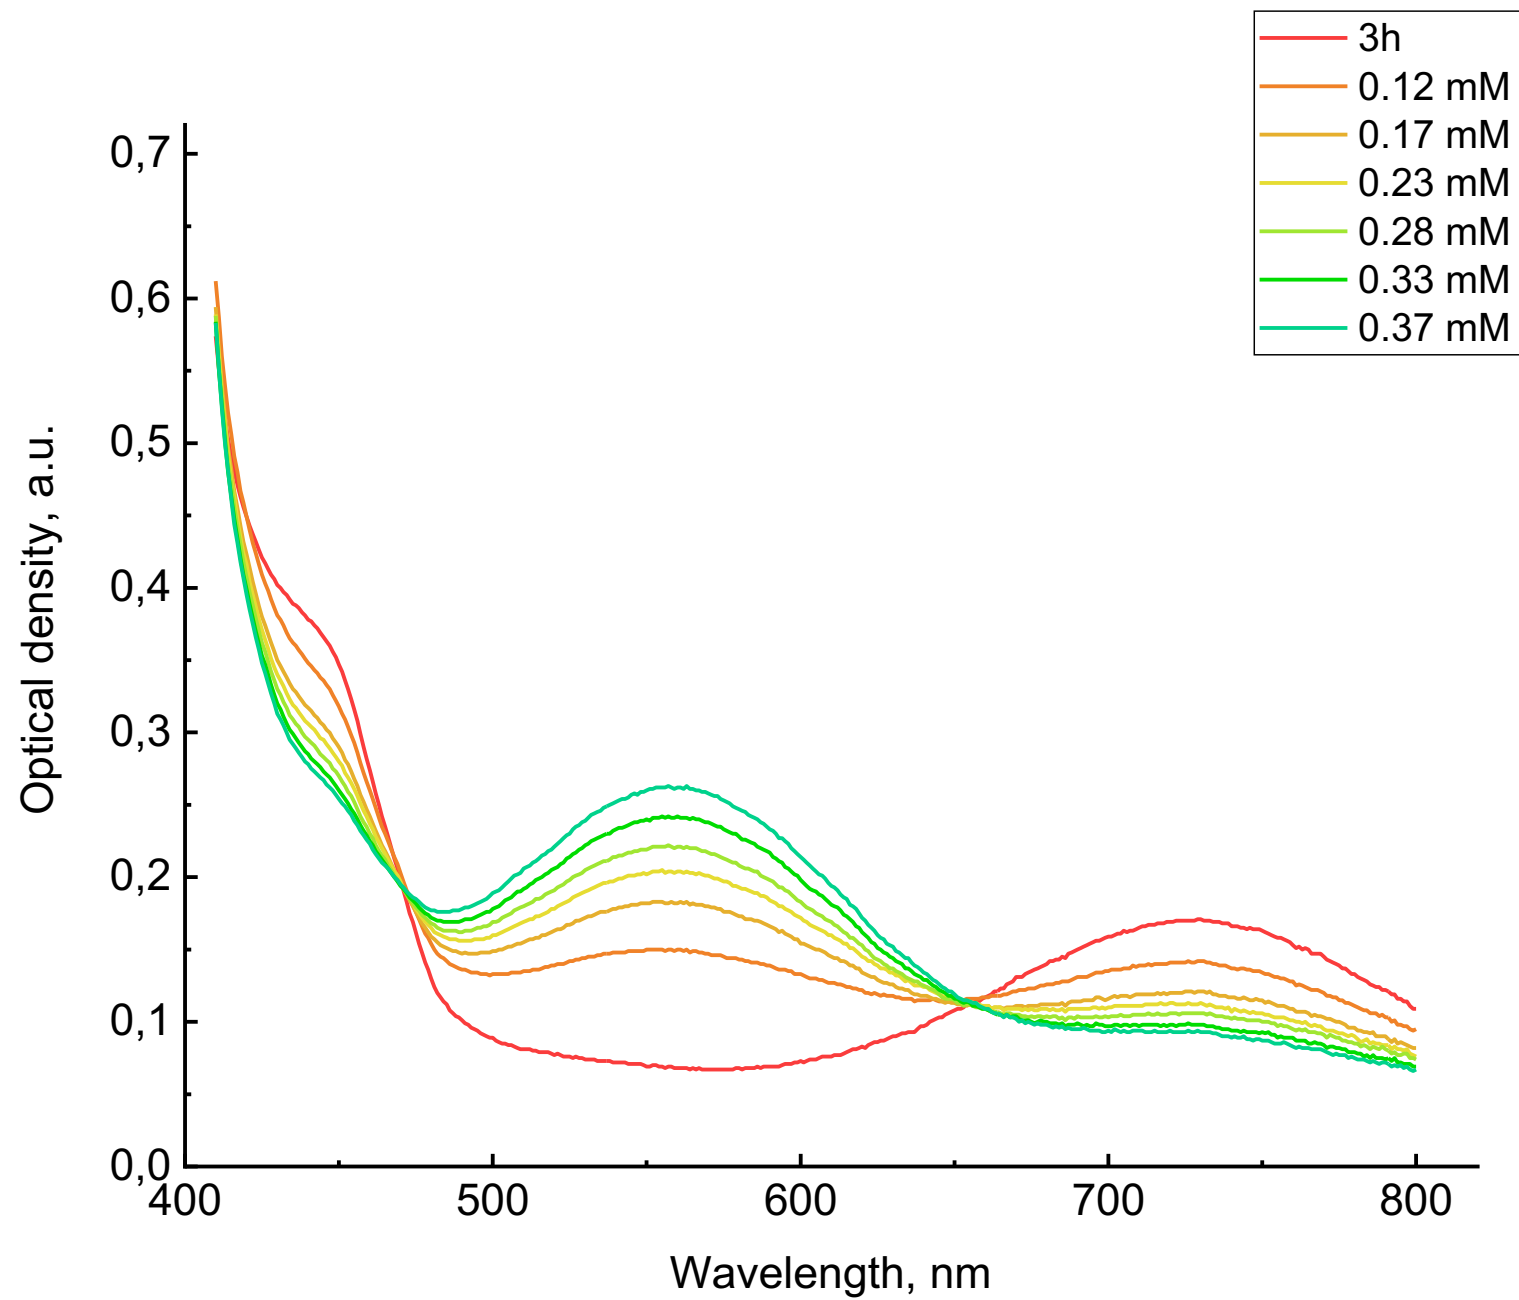

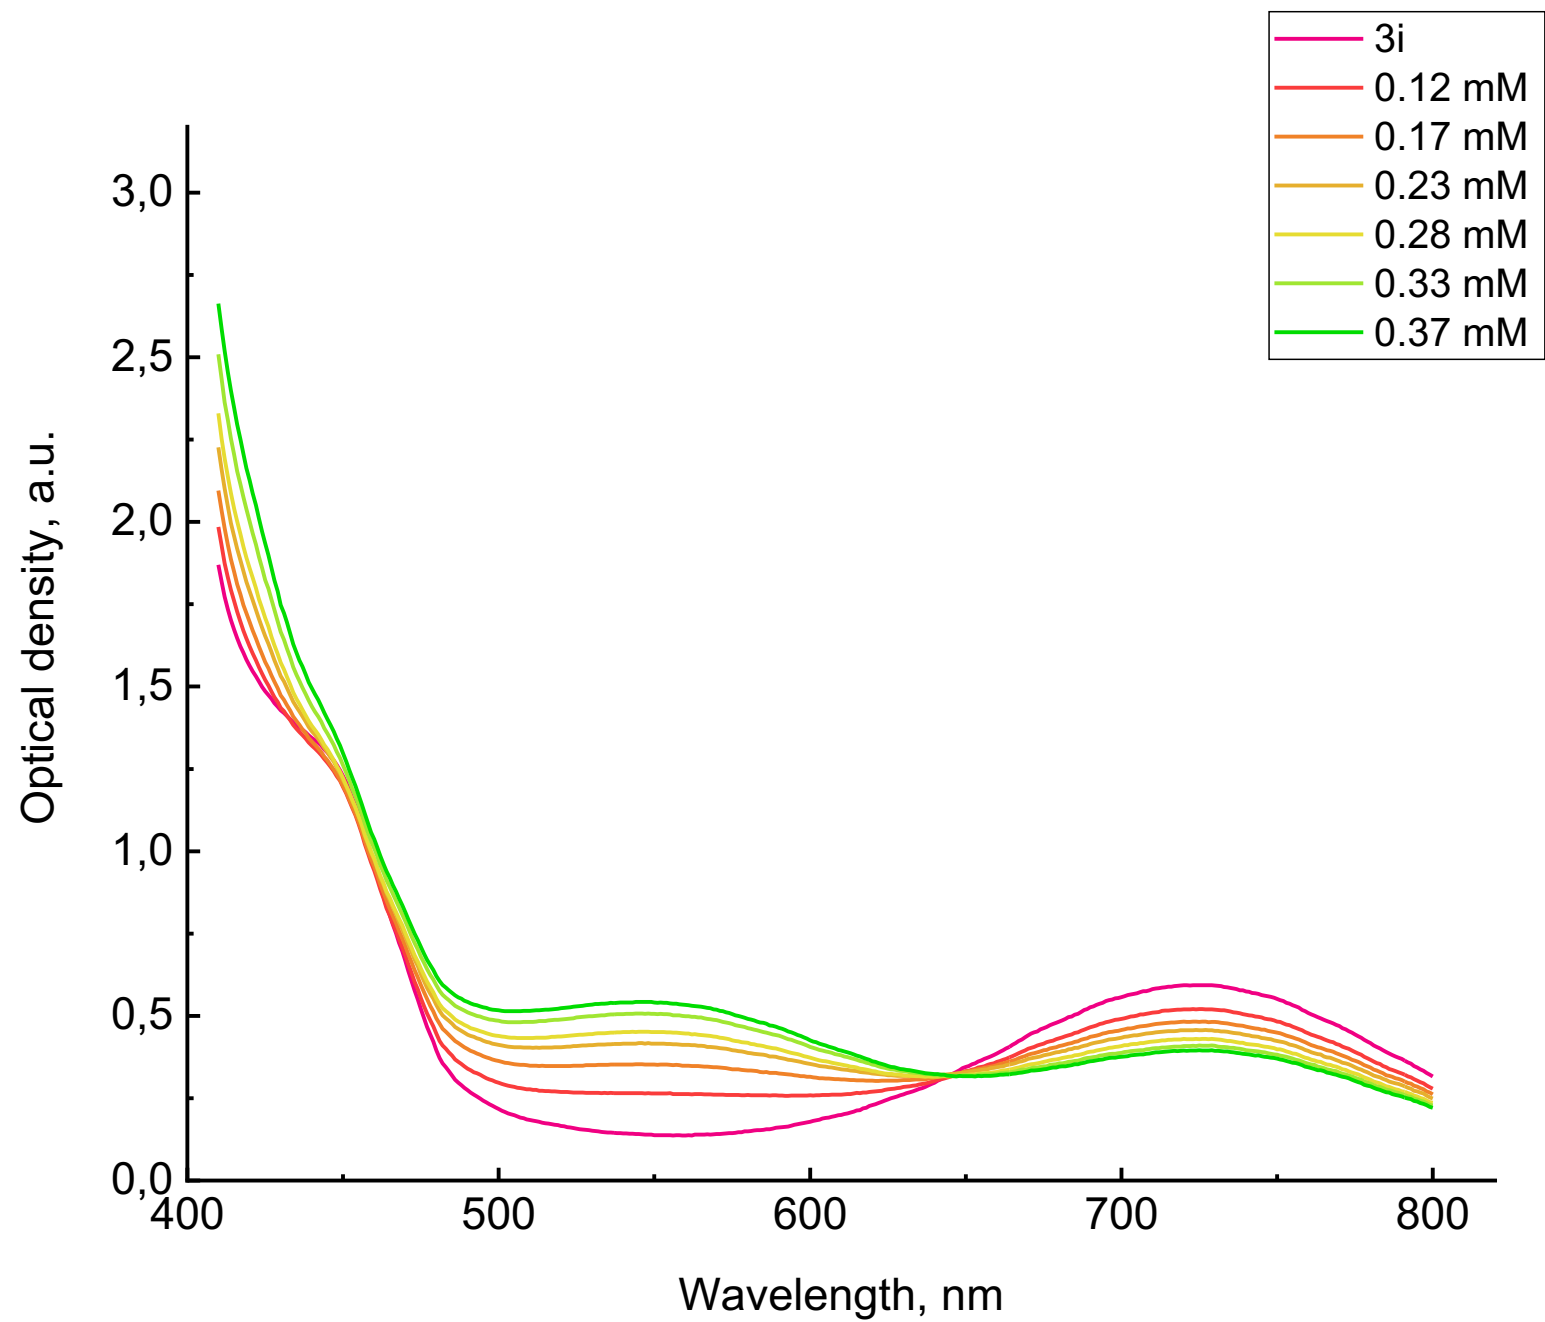

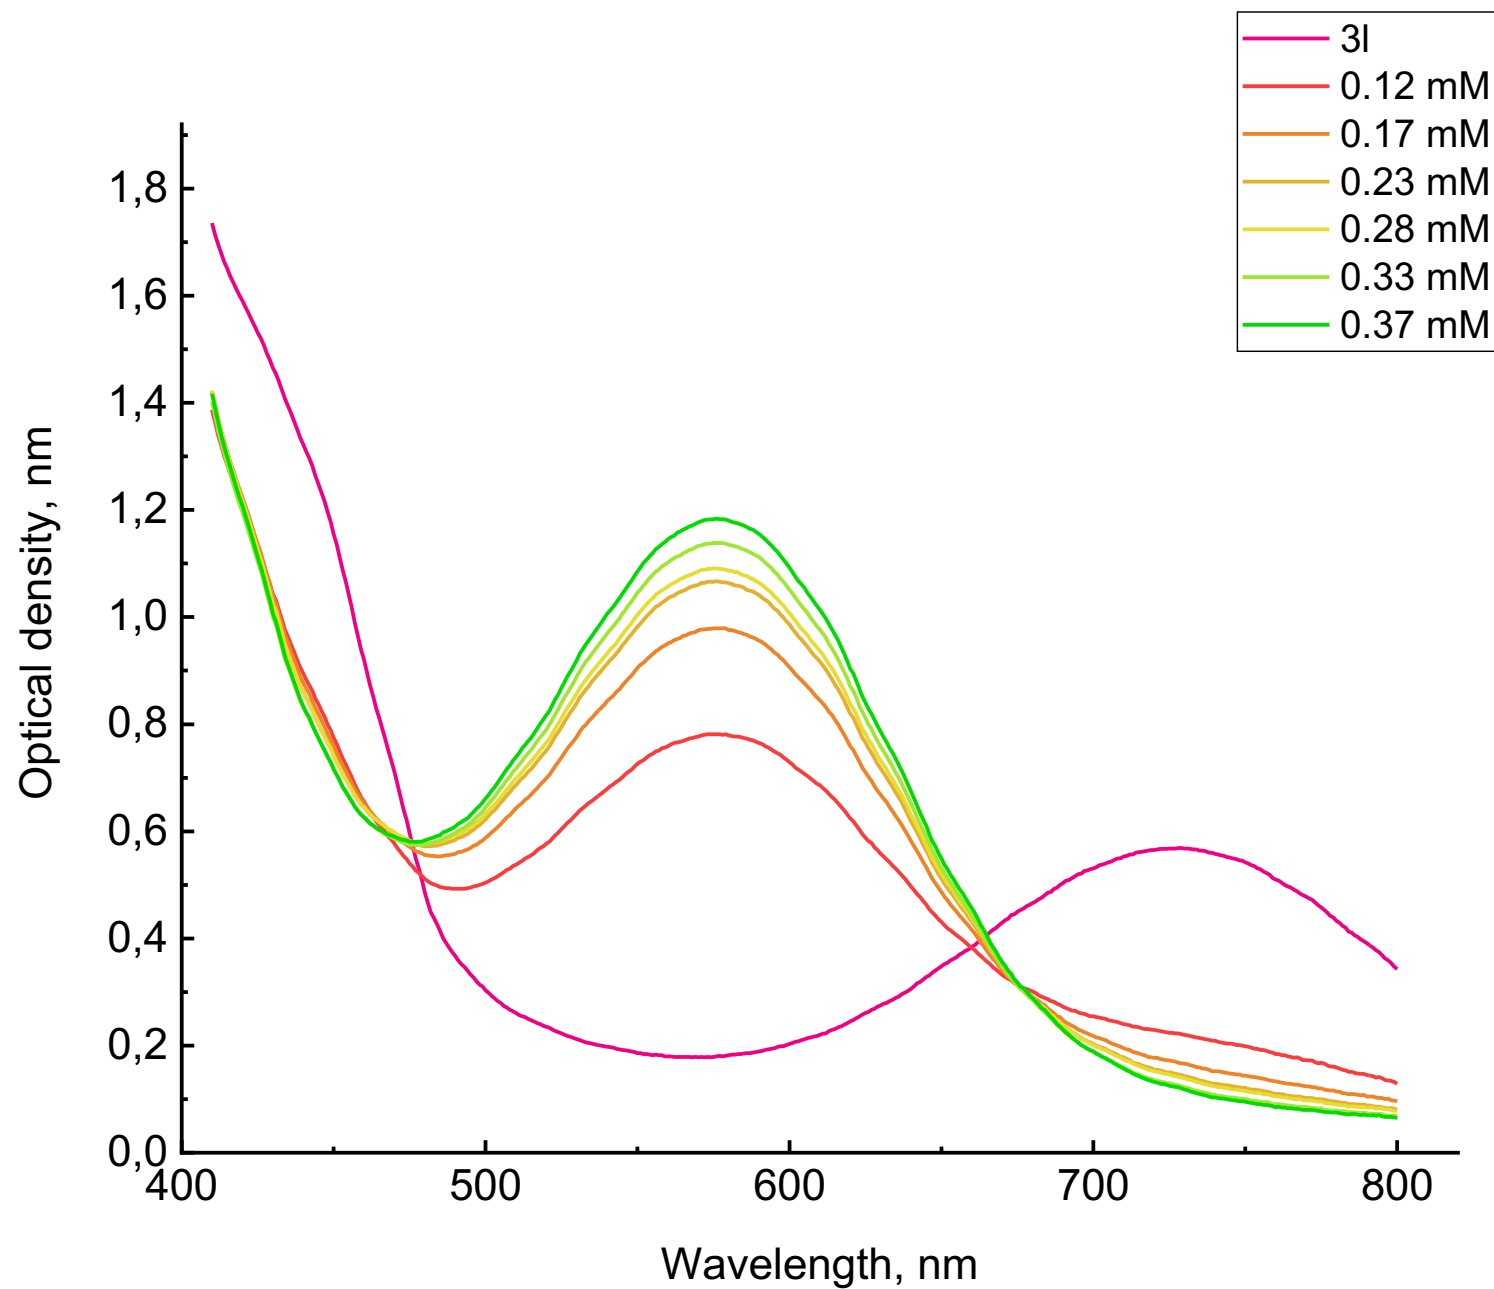

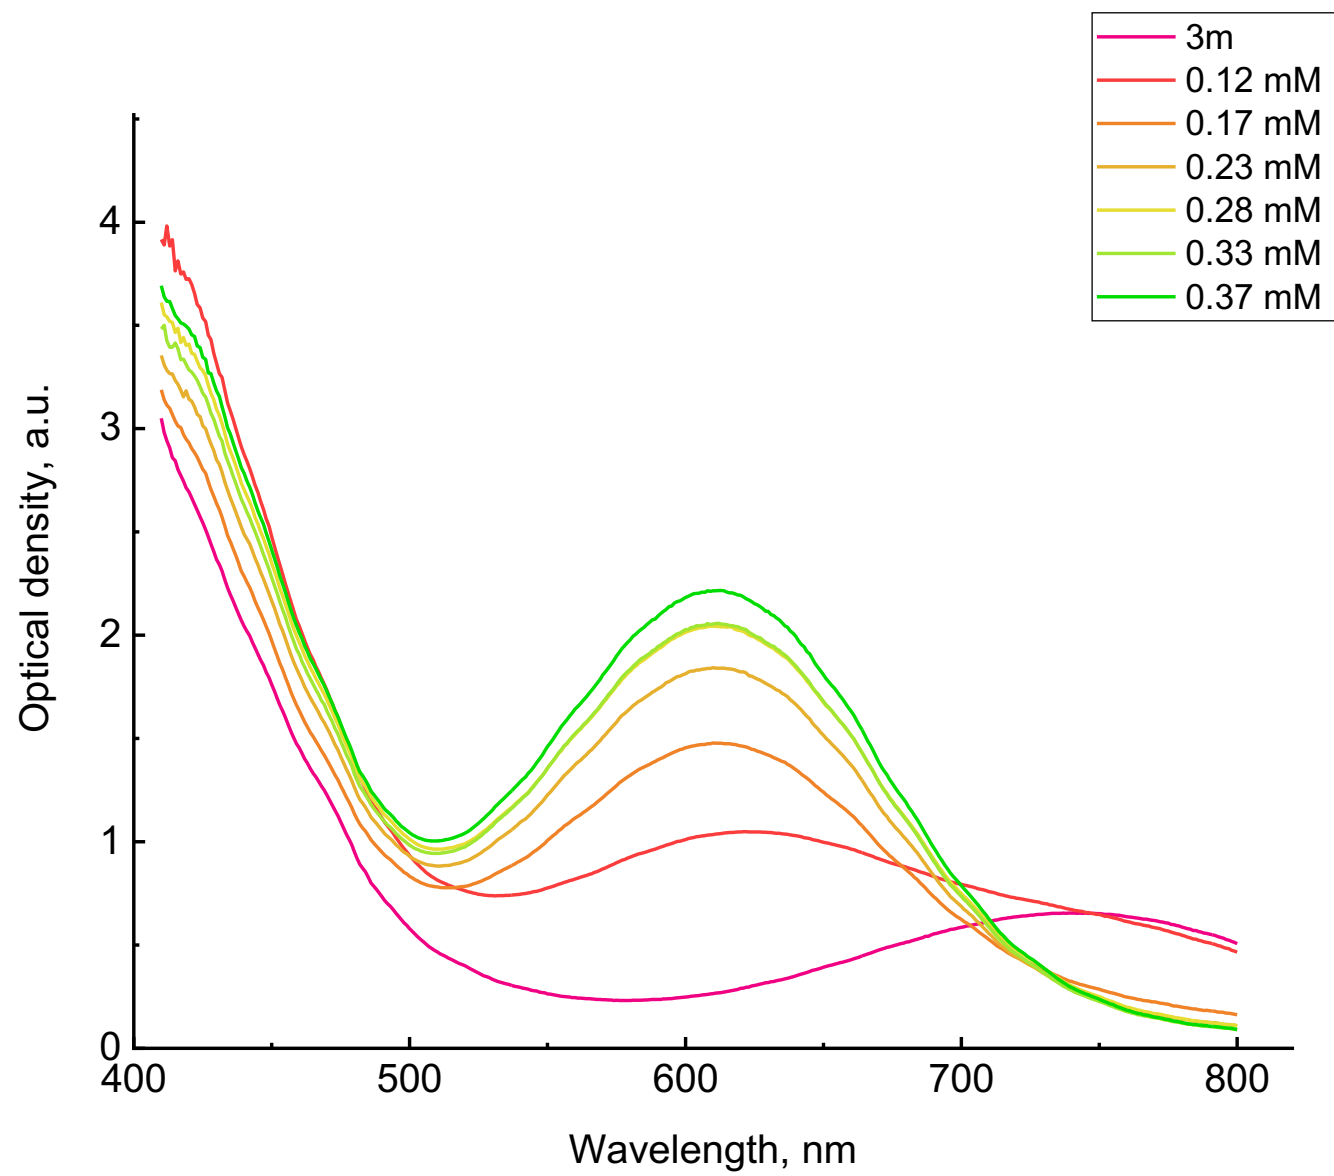

### S3. Crystallographic data

Table S1. Crystal data and structure refinement for **3a**.

|                                 |                                             |                       |
|---------------------------------|---------------------------------------------|-----------------------|
| Empirical formula               | C22 H21 N4                                  |                       |
| Formula weight                  | 341.43                                      |                       |
| Temperature                     | 100.0(1) K                                  |                       |
| Wavelength                      | 1.54184 Å                                   |                       |
| Crystal system                  | Orthorhombic                                |                       |
| Space group                     | Pnma                                        |                       |
| Unit cell dimensions            | a = 8.71984(12) Å                           | $\alpha = 90^\circ$ . |
|                                 | b = 22.2502(4) Å                            | $\beta = 90^\circ$ .  |
|                                 | c = 9.34341(15) Å                           | $\gamma = 90^\circ$ . |
| Volume                          | 1812.79(5) Å <sup>3</sup>                   |                       |
| Z                               | 4                                           |                       |
| Density (calculated)            | 1.251 g/cm <sup>3</sup>                     |                       |
| Absorption coefficient          | 0.592 mm <sup>-1</sup>                      |                       |
| F(000)                          | 724                                         |                       |
| Crystal size                    | 0.16 x 0.11 x 0.02 mm <sup>3</sup>          |                       |
| Theta range for data collection | 3.974 to 79.367°.                           |                       |
| Index ranges                    | -11 ≤ h ≤ 11, -28 ≤ k ≤ 27, -11 ≤ l ≤ 11    |                       |
| Reflections collected           | 24909                                       |                       |
| Independent reflections         | 2009 [R(int) = 0.0441]                      |                       |
| Observed reflections            | 1878                                        |                       |
| Completeness to theta = 67.684° | 100.0 %                                     |                       |
| Absorption correction           | Semi-empirical from equivalents             |                       |
| Max. and min. transmission      | 1.00000 and 0.60120                         |                       |
| Refinement method               | Full-matrix least-squares on F <sup>2</sup> |                       |
| Data / restraints / parameters  | 2009 / 0 / 125                              |                       |



|                                      |                                    |
|--------------------------------------|------------------------------------|
| Goodness-of-fit on $F^2$             | 1.069                              |
| Final R indices [ $I > 2\sigma(I)$ ] | $R1 = 0.0518$ , $wR2 = 0.1347$     |
| R indices (all data)                 | $R1 = 0.0544$ , $wR2 = 0.1367$     |
| Largest diff. peak and hole          | 0.300 and -0.196 e.Å <sup>-3</sup> |

Table S2. Atomic coordinates ( $\times 10^4$ ) and equivalent isotropic displacement parameters (Å<sup>2</sup> $\times 10^3$ ) for **3a**.  $U(\text{eq})$  is defined as one third of the trace of the orthogonalized  $U^{ij}$  tensor.

|       | x        | y       | z       | $U(\text{eq})$ |
|-------|----------|---------|---------|----------------|
| N(1)  | 4480(2)  | 3021(1) | 5736(1) | 37(1)          |
| N(2)  | 5918(2)  | 3036(1) | 5185(1) | 37(1)          |
| C(3)  | 6590(3)  | 2500    | 5030(2) | 36(1)          |
| C(4)  | 8222(3)  | 2500    | 4555(2) | 36(1)          |
| C(5)  | 8997(2)  | 3040(1) | 4338(2) | 42(1)          |
| C(6)  | 10512(2) | 3039(1) | 3901(2) | 49(1)          |
| C(7)  | 11278(3) | 2500    | 3678(3) | 50(1)          |
| C(8)  | 4047(3)  | 2500    | 6579(3) | 40(1)          |
| C(9)  | 3687(2)  | 3570(1) | 5837(2) | 34(1)          |
| C(10) | 2570(2)  | 3665(1) | 6878(2) | 38(1)          |
| C(11) | 1807(2)  | 4213(1) | 6944(2) | 39(1)          |
| C(12) | 2156(2)  | 4678(1) | 6016(2) | 38(1)          |
| C(13) | 3274(2)  | 4571(1) | 4981(2) | 40(1)          |
| C(14) | 4024(2)  | 4027(1) | 4873(2) | 38(1)          |
| C(15) | 1389(2)  | 5286(1) | 6122(2) | 49(1)          |

Table S3. Bond lengths [Å] and angles [°] for **3a**.

|             |            |
|-------------|------------|
| N(1)-N(2)   | 1.3557(18) |
| N(1)-C(8)   | 1.4519(18) |
| N(1)-C(9)   | 1.4055(18) |
| N(2)-C(3)   | 1.3373(16) |
| C(3)-N(2)#1 | 1.3373(16) |
| C(3)-C(4)   | 1.490(3)   |
| C(4)-C(5)#1 | 1.3927(19) |
| C(4)-C(5)   | 1.3927(19) |
| C(5)-H(5)   | 0.9500     |
| C(5)-C(6)   | 1.382(2)   |
| C(6)-H(6)   | 0.9500     |
| C(6)-C(7)   | 1.389(2)   |
| C(7)-C(6)#1 | 1.389(2)   |
| C(7)-H(7)   | 0.9500     |
| C(8)-N(1)#1 | 1.4519(18) |
| C(8)-H(8A)  | 0.9900     |
| C(8)-H(8B)  | 0.9900     |
| C(9)-C(10)  | 1.393(2)   |
| C(9)-C(14)  | 1.392(2)   |
| C(10)-H(10) | 0.9500     |
| C(10)-C(11) | 1.390(2)   |
| C(11)-H(11) | 0.9500     |
| C(11)-C(12) | 1.385(2)   |
| C(12)-C(13) | 1.393(2)   |
| C(12)-C(15) | 1.512(2)   |

|              |          |
|--------------|----------|
| C(13)-H(13)  | 0.9500   |
| C(13)-C(14)  | 1.379(2) |
| C(14)-H(14)  | 0.9500   |
| C(15)-H(15A) | 0.9800   |
| C(15)-H(15B) | 0.9800   |
| C(15)-H(15C) | 0.9800   |

|                  |            |
|------------------|------------|
| N(2)-N(1)-C(8)   | 117.80(13) |
| N(2)-N(1)-C(9)   | 117.30(12) |
| C(9)-N(1)-C(8)   | 121.92(14) |
| C(3)-N(2)-N(1)   | 115.12(13) |
| N(2)#1-C(3)-N(2) | 126.3(2)   |
| N(2)-C(3)-C(4)   | 116.80(10) |
| N(2)#1-C(3)-C(4) | 116.80(10) |
| C(5)#1-C(4)-C(3) | 120.46(11) |
| C(5)-C(4)-C(3)   | 120.46(11) |
| C(5)#1-C(4)-C(5) | 119.1(2)   |
| C(4)-C(5)-H(5)   | 119.8      |
| C(6)-C(5)-C(4)   | 120.42(16) |
| C(6)-C(5)-H(5)   | 119.8      |
| C(5)-C(6)-H(6)   | 119.8      |
| C(5)-C(6)-C(7)   | 120.30(17) |
| C(7)-C(6)-H(6)   | 119.8      |
| C(6)#1-C(7)-C(6) | 119.5(2)   |
| C(6)#1-C(7)-H(7) | 120.3      |
| C(6)-C(7)-H(7)   | 120.3      |
| N(1)-C(8)-N(1)#1 | 105.97(18) |

|                     |            |
|---------------------|------------|
| N(1)-C(8)-H(8A)     | 110.5      |
| N(1)#1-C(8)-H(8A)   | 110.5      |
| N(1)-C(8)-H(8B)     | 110.5      |
| N(1)#1-C(8)-H(8B)   | 110.5      |
| H(8A)-C(8)-H(8B)    | 108.7      |
| C(10)-C(9)-N(1)     | 121.55(13) |
| C(14)-C(9)-N(1)     | 119.23(14) |
| C(14)-C(9)-C(10)    | 119.22(14) |
| C(9)-C(10)-H(10)    | 120.0      |
| C(11)-C(10)-C(9)    | 119.95(14) |
| C(11)-C(10)-H(10)   | 120.0      |
| C(10)-C(11)-H(11)   | 119.2      |
| C(12)-C(11)-C(10)   | 121.52(15) |
| C(12)-C(11)-H(11)   | 119.2      |
| C(11)-C(12)-C(13)   | 117.43(14) |
| C(11)-C(12)-C(15)   | 122.02(15) |
| C(13)-C(12)-C(15)   | 120.53(14) |
| C(12)-C(13)-H(13)   | 118.9      |
| C(14)-C(13)-C(12)   | 122.19(14) |
| C(14)-C(13)-H(13)   | 118.9      |
| C(9)-C(14)-H(14)    | 120.2      |
| C(13)-C(14)-C(9)    | 119.66(15) |
| C(13)-C(14)-H(14)   | 120.2      |
| C(12)-C(15)-H(15A)  | 109.5      |
| C(12)-C(15)-H(15B)  | 109.5      |
| C(12)-C(15)-H(15C)  | 109.5      |
| H(15A)-C(15)-H(15B) | 109.5      |

|                     |       |
|---------------------|-------|
| H(15A)-C(15)-H(15C) | 109.5 |
| H(15B)-C(15)-H(15C) | 109.5 |

---

Symmetry transformations used to generate equivalent atoms:

#1 x,-y+1/2,z

Table S4. Anisotropic displacement parameters ( $\text{\AA}^2 \times 10^3$ ) for **3a**. The anisotropic displacement factor exponent takes the form:  $-2\pi^2 [h^2 a^{*2} U^{11} + \dots + 2 h k a^* b^* U^{12}]$

|       | $U^{11}$ | $U^{22}$ | $U^{33}$ | $U^{23}$ | $U^{13}$ | $U^{12}$ |
|-------|----------|----------|----------|----------|----------|----------|
| N(1)  | 39(1)    | 26(1)    | 46(1)    | 1(1)     | 2(1)     | 0(1)     |
| N(2)  | 37(1)    | 33(1)    | 40(1)    | -2(1)    | 0(1)     | -1(1)    |
| C(3)  | 42(1)    | 32(1)    | 36(1)    | 0        | -4(1)    | 0        |
| C(4)  | 42(1)    | 32(1)    | 34(1)    | 0        | -5(1)    | 0        |
| C(5)  | 42(1)    | 36(1)    | 47(1)    | 3(1)     | -2(1)    | -2(1)    |
| C(6)  | 44(1)    | 52(1)    | 49(1)    | 7(1)     | 0(1)     | -8(1)    |
| C(7)  | 37(1)    | 74(2)    | 40(1)    | 0        | 2(1)     | 0        |
| C(8)  | 46(1)    | 27(1)    | 46(1)    | 0        | 5(1)     | 0        |
| C(9)  | 36(1)    | 25(1)    | 42(1)    | -2(1)    | -4(1)    | 0(1)     |
| C(10) | 49(1)    | 26(1)    | 40(1)    | 0(1)     | 3(1)     | -4(1)    |
| C(11) | 44(1)    | 30(1)    | 44(1)    | -6(1)    | 5(1)     | -2(1)    |
| C(12) | 41(1)    | 27(1)    | 44(1)    | -2(1)    | -4(1)    | 1(1)     |
| C(13) | 44(1)    | 30(1)    | 45(1)    | 6(1)     | 0(1)     | -1(1)    |
| C(14) | 36(1)    | 33(1)    | 44(1)    | 2(1)     | 2(1)     | 0(1)     |
| C(15) | 61(1)    | 30(1)    | 55(1)    | -3(1)    | -4(1)    | 6(1)     |

---

Table S5. Hydrogen coordinates ( $\times 10^4$ ) and isotropic displacement parameters ( $\text{\AA}^2 \times 10^{-3}$ ) for **3a**.

|        | x     | y    | z    | U(eq) |
|--------|-------|------|------|-------|
| H(5)   | 8482  | 3410 | 4491 | 50    |
| H(6)   | 11031 | 3409 | 3753 | 58    |
| H(7)   | 12318 | 2500 | 3375 | 60    |
| H(8A)  | 2929  | 2500 | 6764 | 47    |
| H(8B)  | 4593  | 2500 | 7508 | 47    |
| H(10)  | 2330  | 3356 | 7543 | 46    |
| H(11)  | 1028  | 4269 | 7643 | 47    |
| H(13)  | 3527  | 4883 | 4328 | 48    |
| H(14)  | 4766  | 3966 | 4143 | 46    |
| H(15A) | 2036  | 5559 | 6683 | 73    |
| H(15B) | 391   | 5242 | 6593 | 73    |
| H(15C) | 1242  | 5452 | 5160 | 73    |

Table S6. Torsion angles [°] for **3a**.

---

|                         |             |
|-------------------------|-------------|
| N(1)-N(2)-C(3)-N(2)#1   | 9.3(3)      |
| N(1)-N(2)-C(3)-C(4)     | -174.56(15) |
| N(1)-C(9)-C(10)-C(11)   | -179.85(14) |
| N(1)-C(9)-C(14)-C(13)   | -178.76(14) |
| N(2)-N(1)-C(8)-N(1)#1   | -49.3(2)    |
| N(2)-N(1)-C(9)-C(10)    | -151.90(14) |
| N(2)-N(1)-C(9)-C(14)    | 28.3(2)     |
| N(2)-C(3)-C(4)-C(5)#1   | -178.64(18) |
| N(2)#1-C(3)-C(4)-C(5)   | 178.64(18)  |
| N(2)#1-C(3)-C(4)-C(5)#1 | -2.1(3)     |
| N(2)-C(3)-C(4)-C(5)     | 2.1(3)      |
| C(3)-C(4)-C(5)-C(6)     | 179.83(18)  |
| C(4)-C(5)-C(6)-C(7)     | -0.2(3)     |
| C(5)#1-C(4)-C(5)-C(6)   | 0.6(3)      |
| C(5)-C(6)-C(7)-C(6)#1   | -0.2(4)     |
| C(8)-N(1)-N(2)-C(3)     | 23.0(2)     |
| C(8)-N(1)-C(9)-C(10)    | 8.1(2)      |
| C(8)-N(1)-C(9)-C(14)    | -171.70(16) |
| C(9)-N(1)-N(2)-C(3)     | -176.17(15) |
| C(9)-N(1)-C(8)-N(1)#1   | 150.80(11)  |
| C(9)-C(10)-C(11)-C(12)  | -1.6(2)     |
| C(10)-C(9)-C(14)-C(13)  | 1.4(2)      |
| C(10)-C(11)-C(12)-C(13) | 1.8(2)      |
| C(10)-C(11)-C(12)-C(15) | -177.00(15) |
| C(11)-C(12)-C(13)-C(14) | -0.4(2)     |

|                         |            |
|-------------------------|------------|
| C(12)-C(13)-C(14)-C(9)  | -1.2(2)    |
| C(14)-C(9)-C(10)-C(11)  | 0.0(2)     |
| C(15)-C(12)-C(13)-C(14) | 178.45(15) |

---

Symmetry transformations used to generate equivalent atoms:

#1 x,-y+1/2,z

## S4. IR spectra



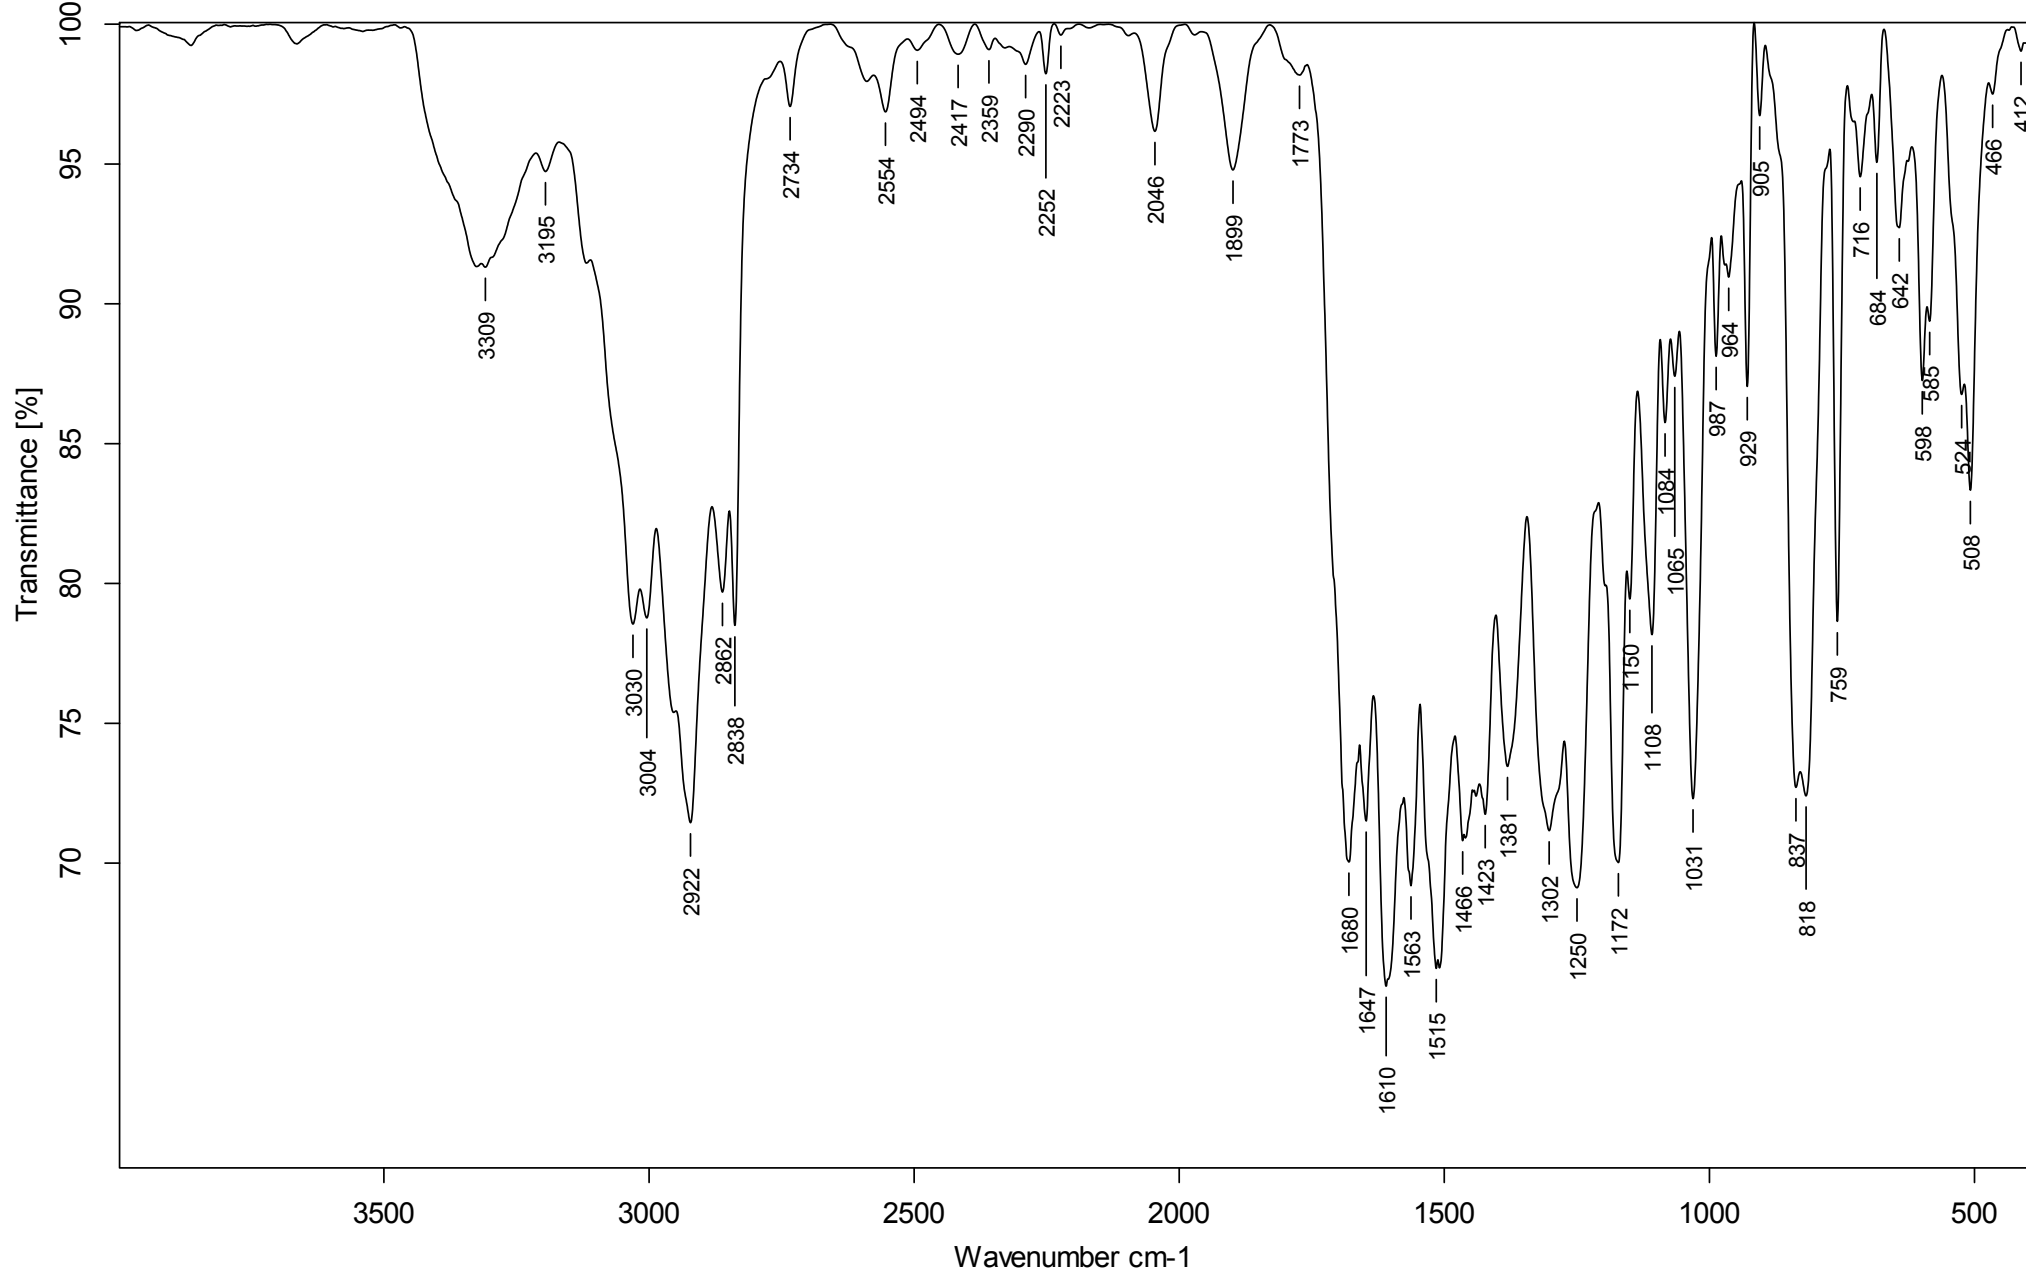

3b KBr

18.02.2022

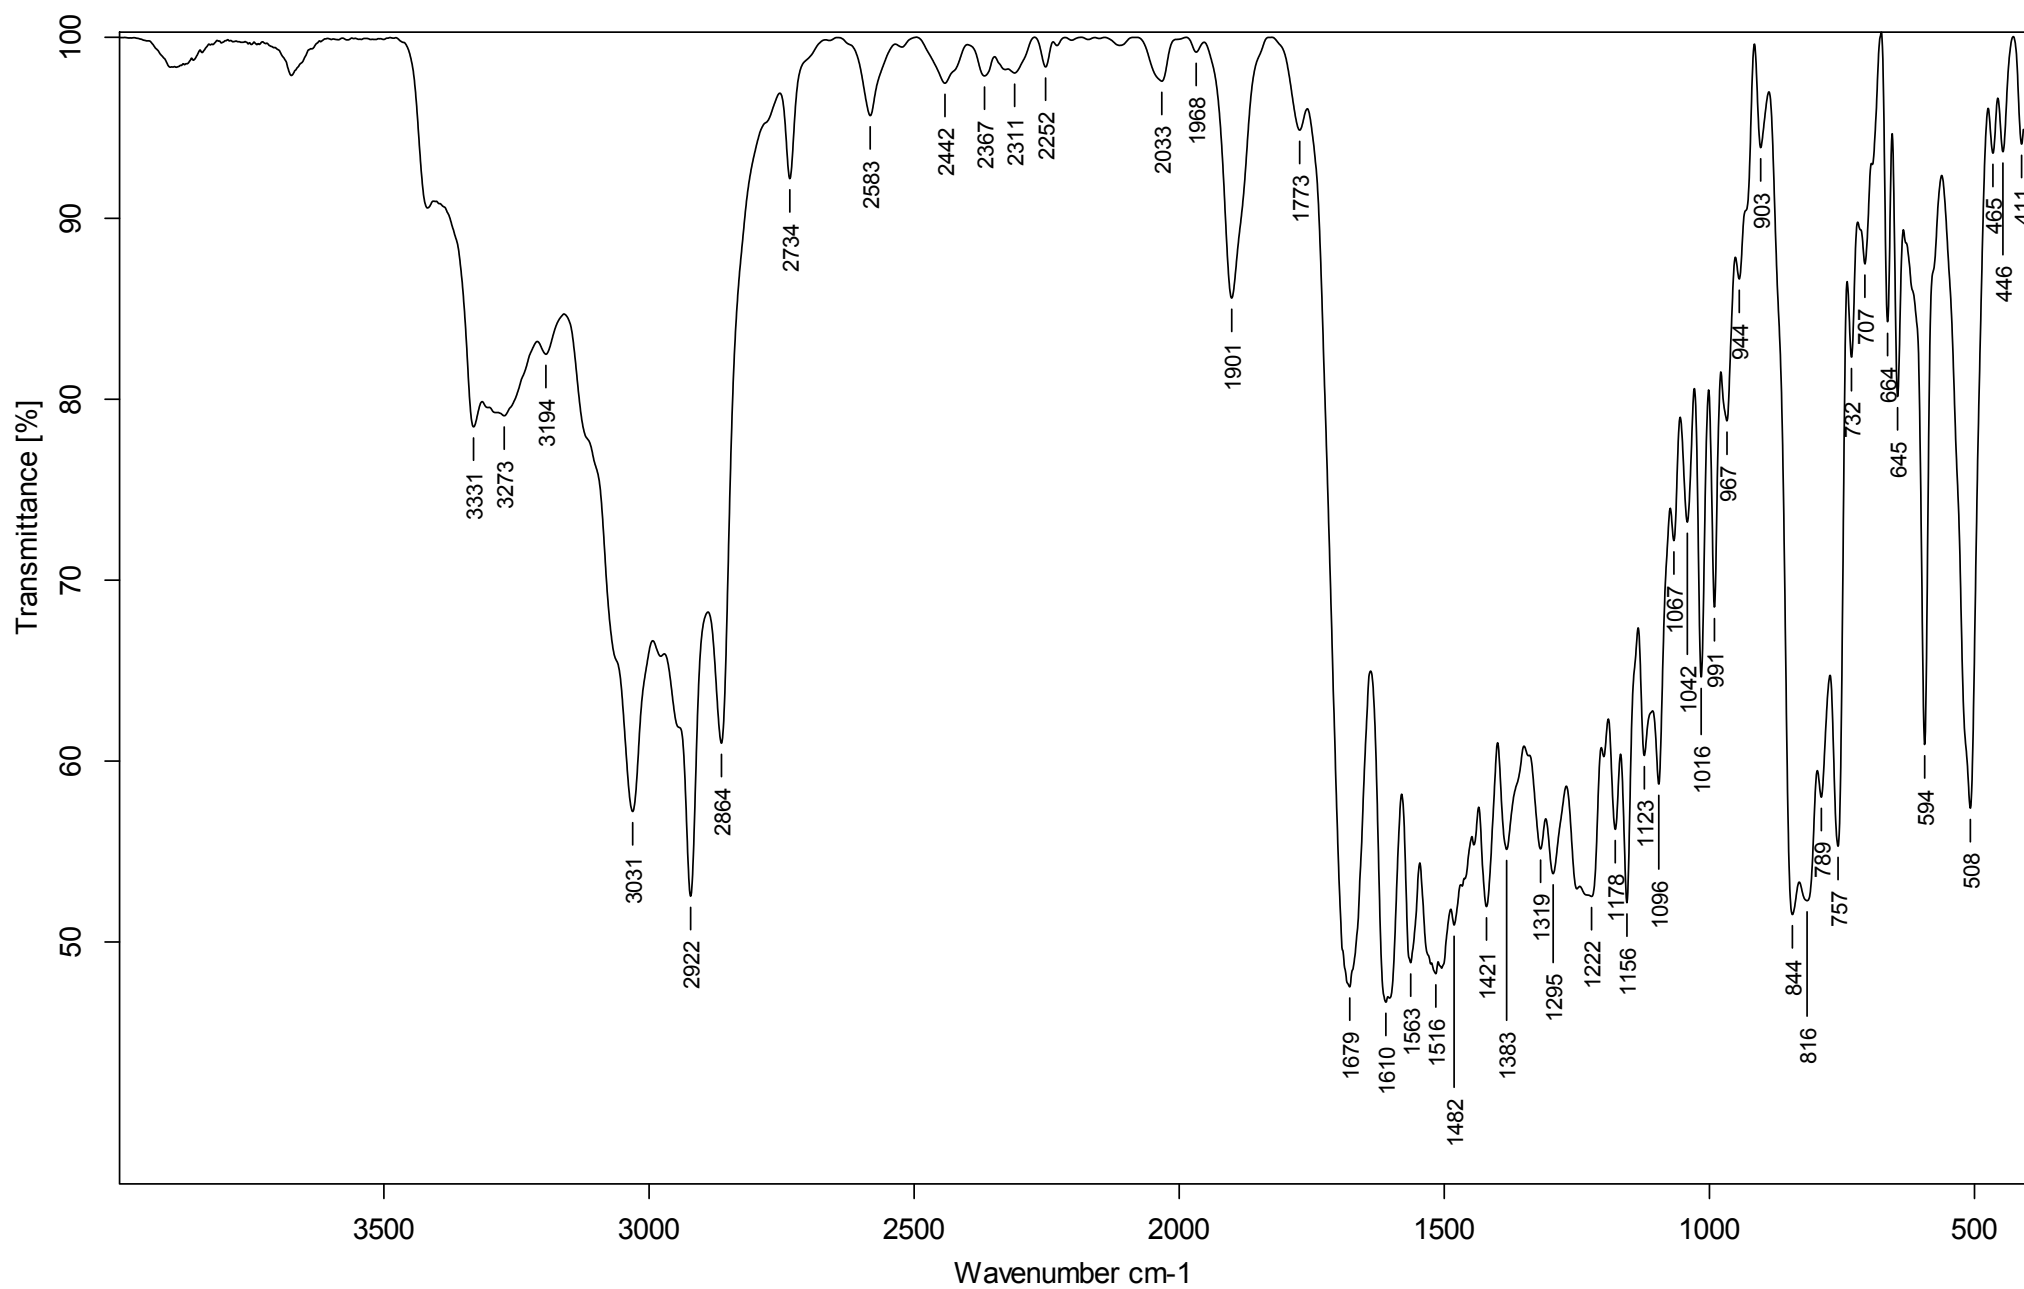

**3c** KBr

18.02.2022

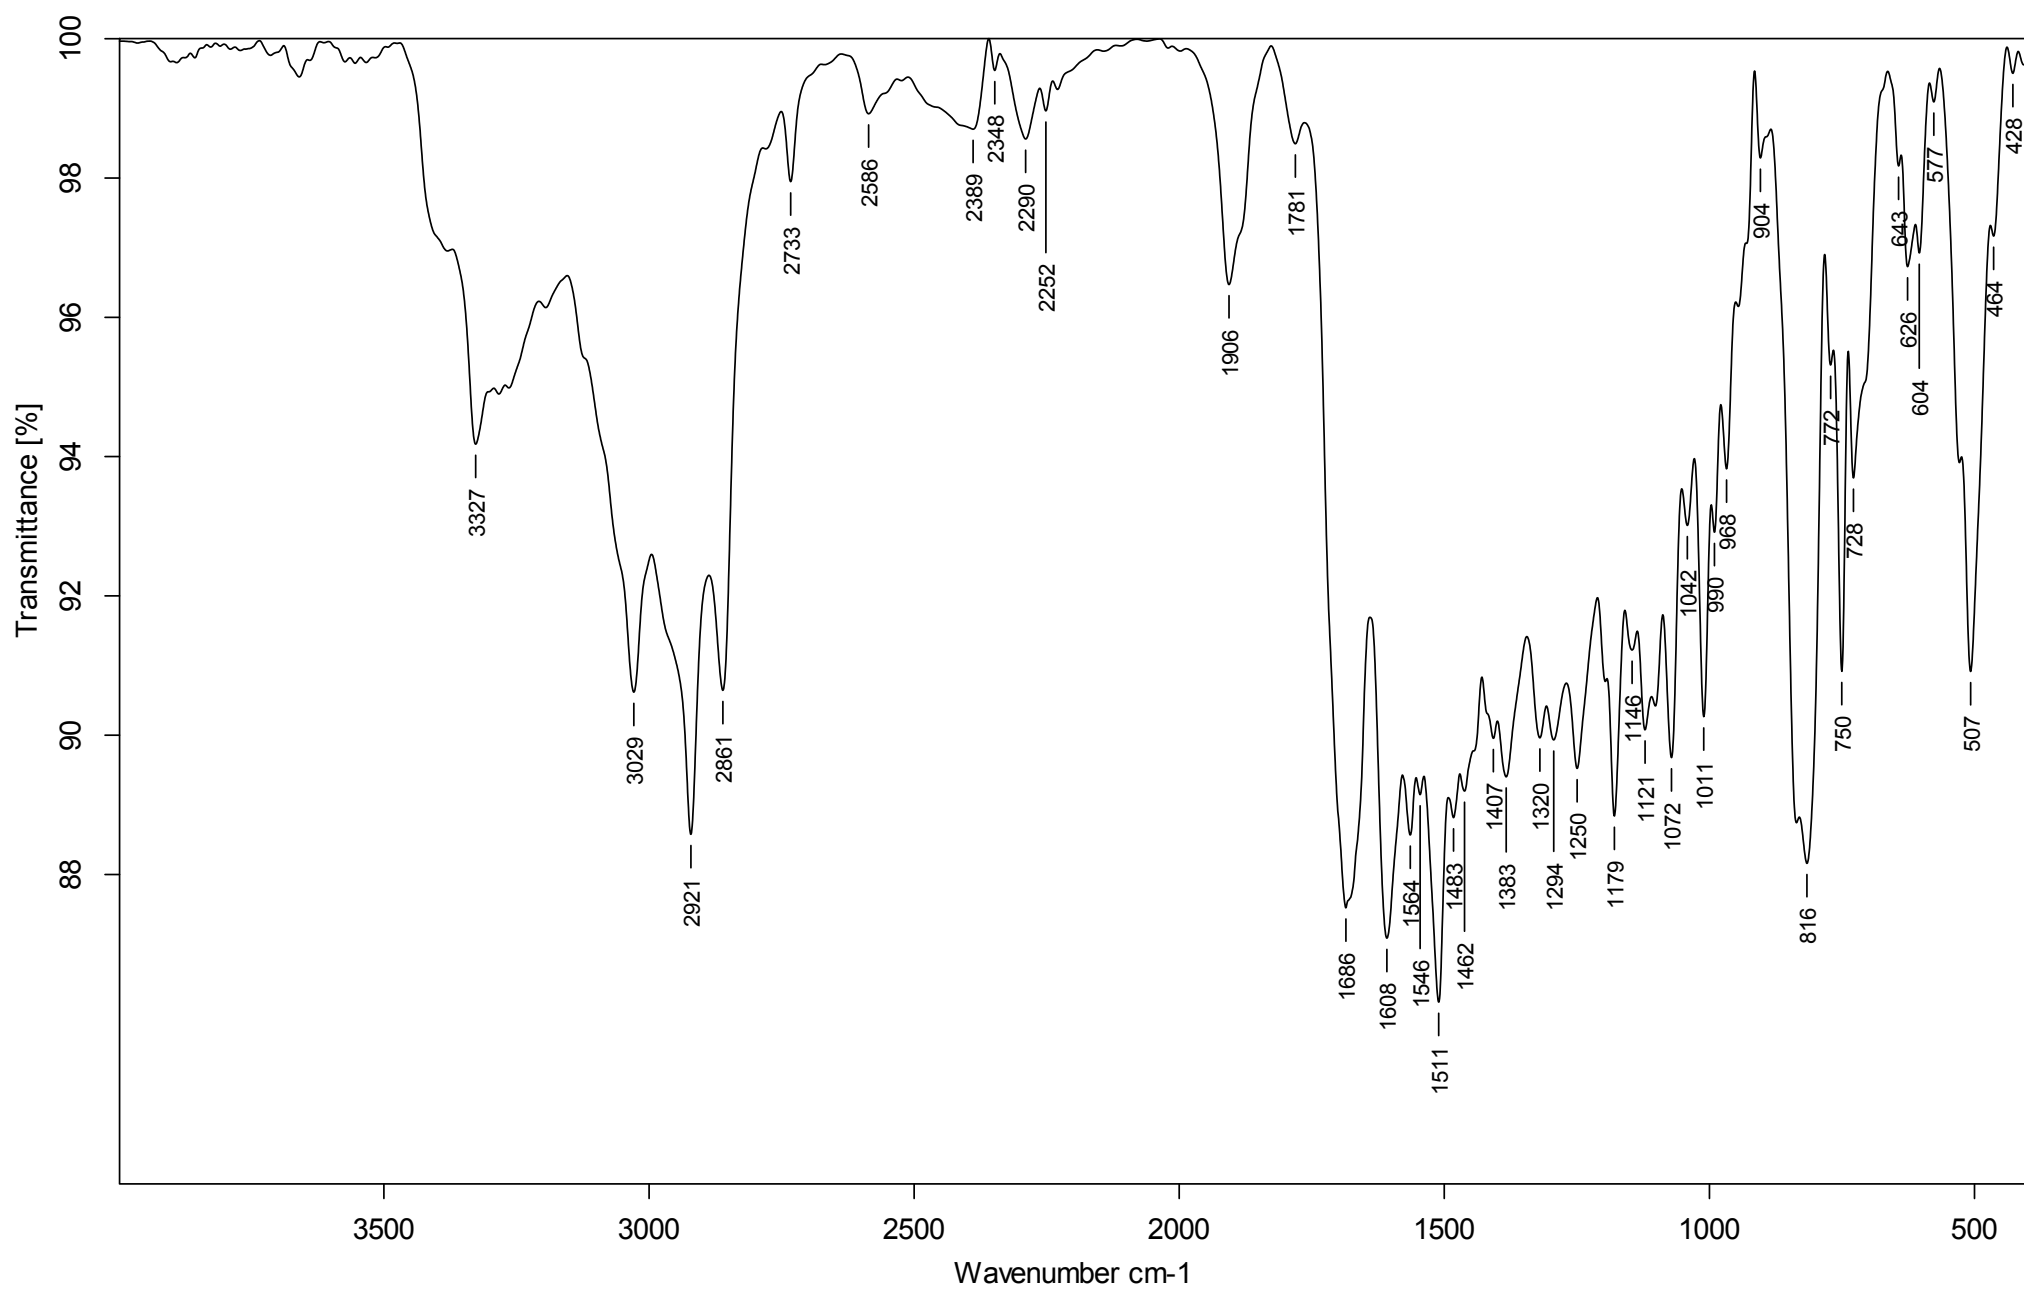

**3e** KBr

18.02.2022

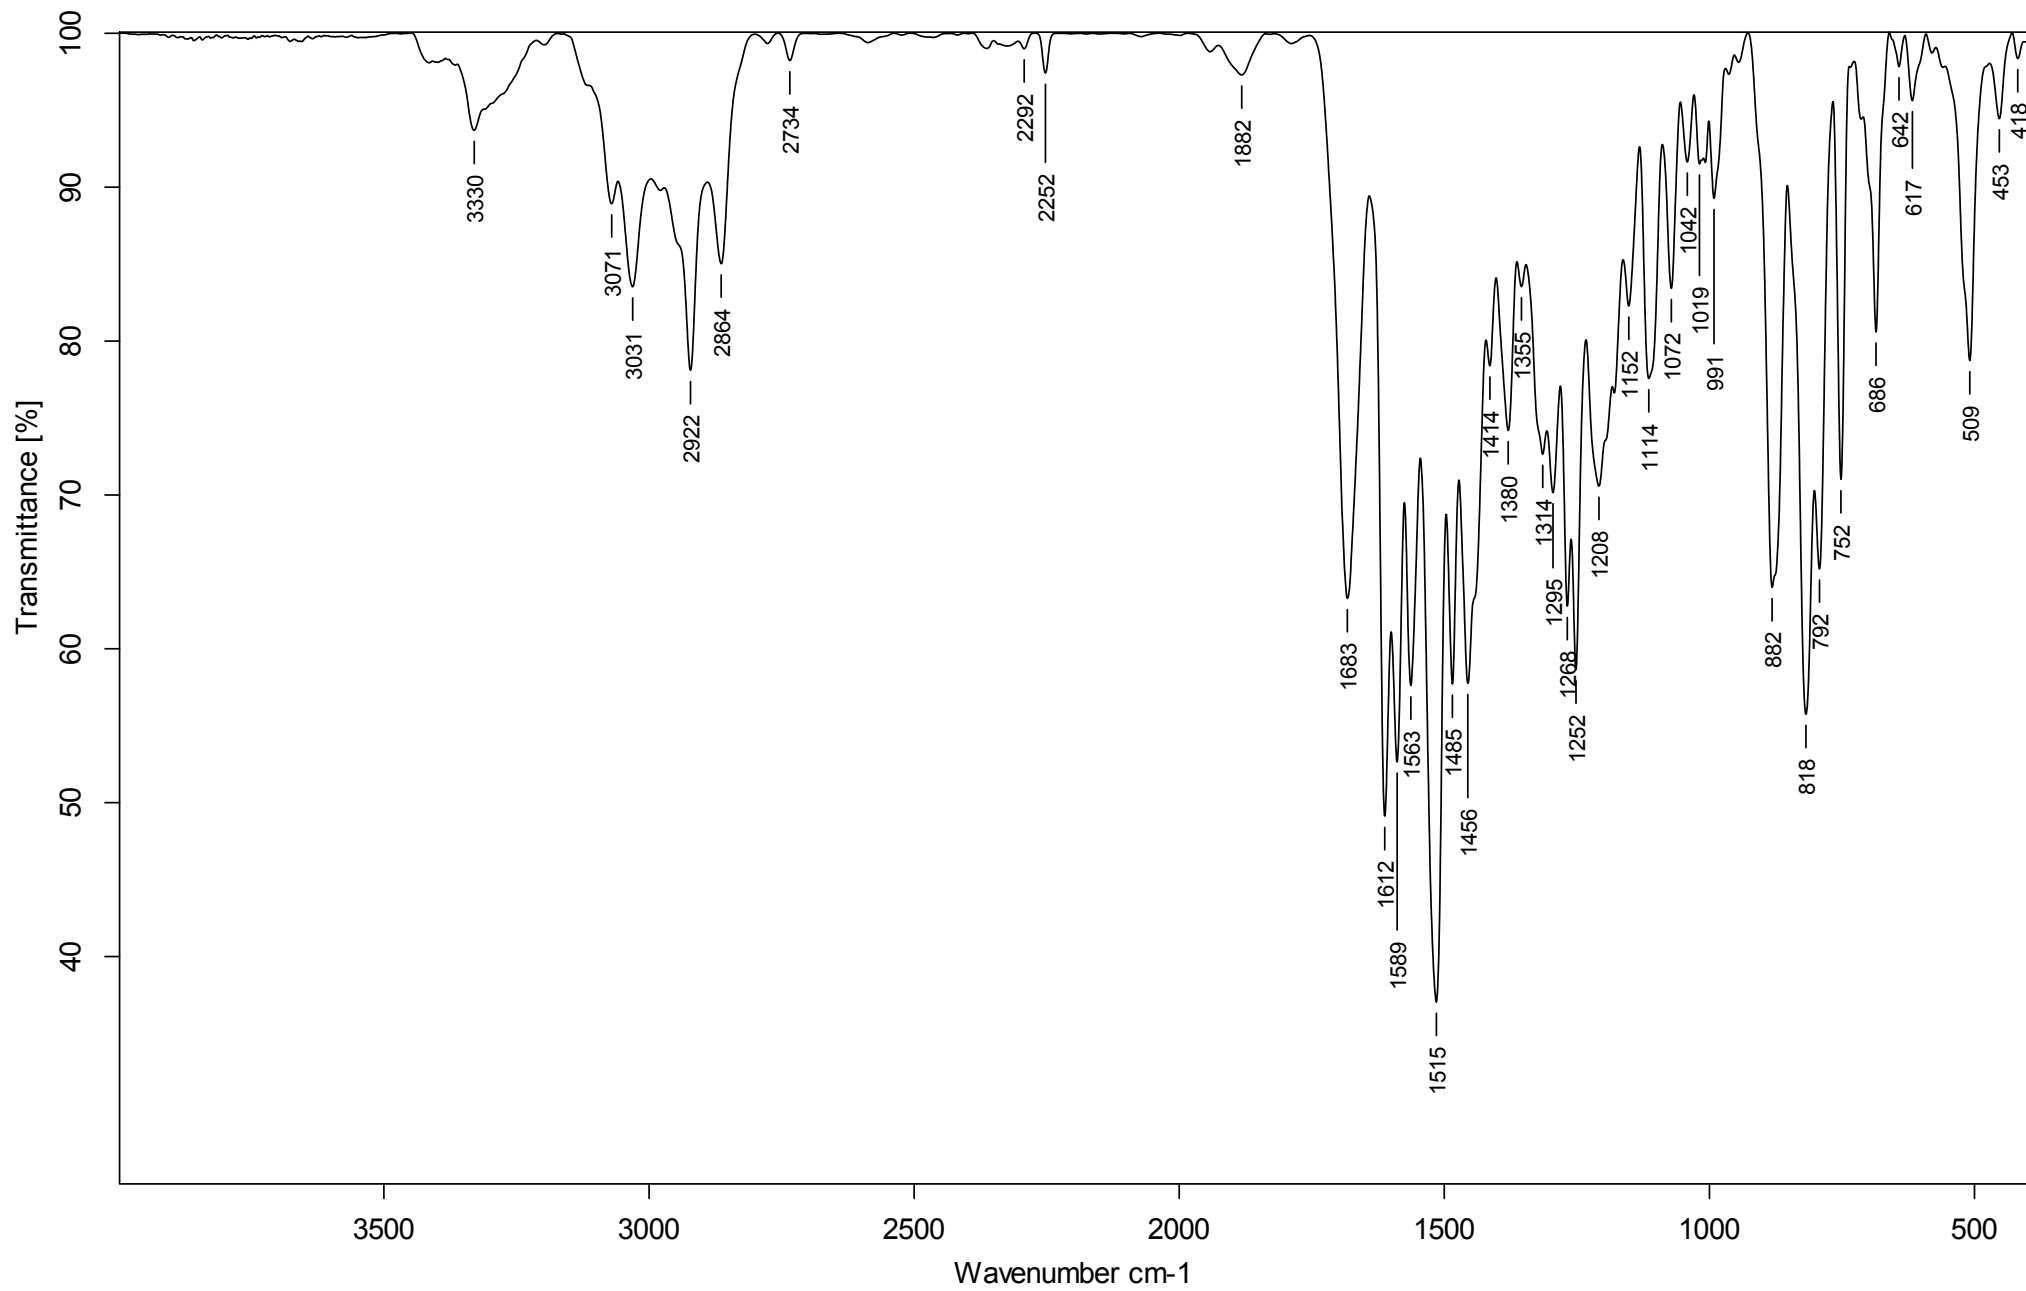

3f KBr

18.02.2022

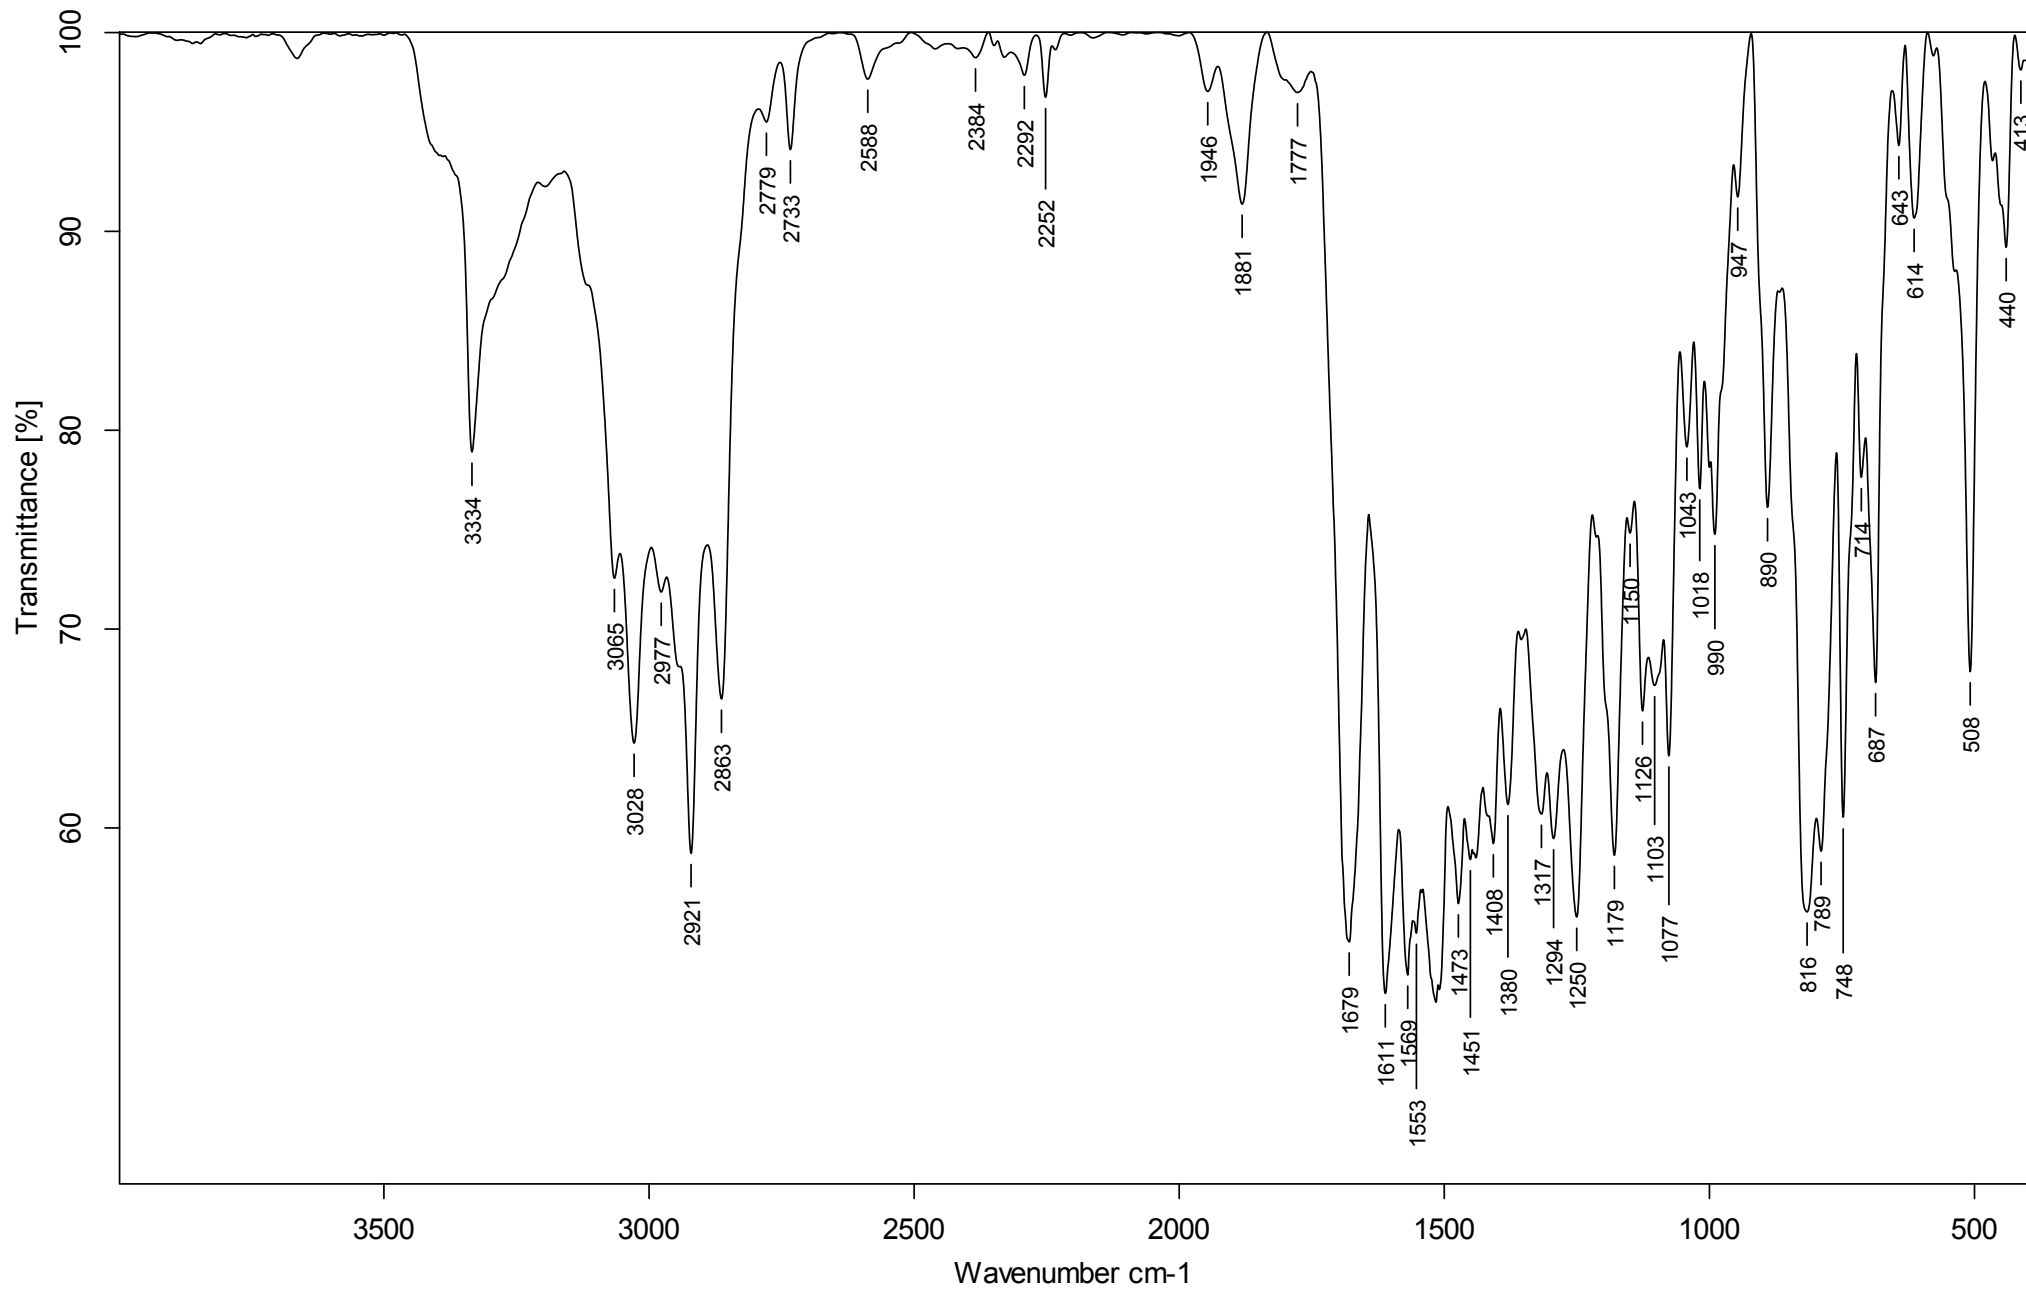

3g KBr

18.02.2022

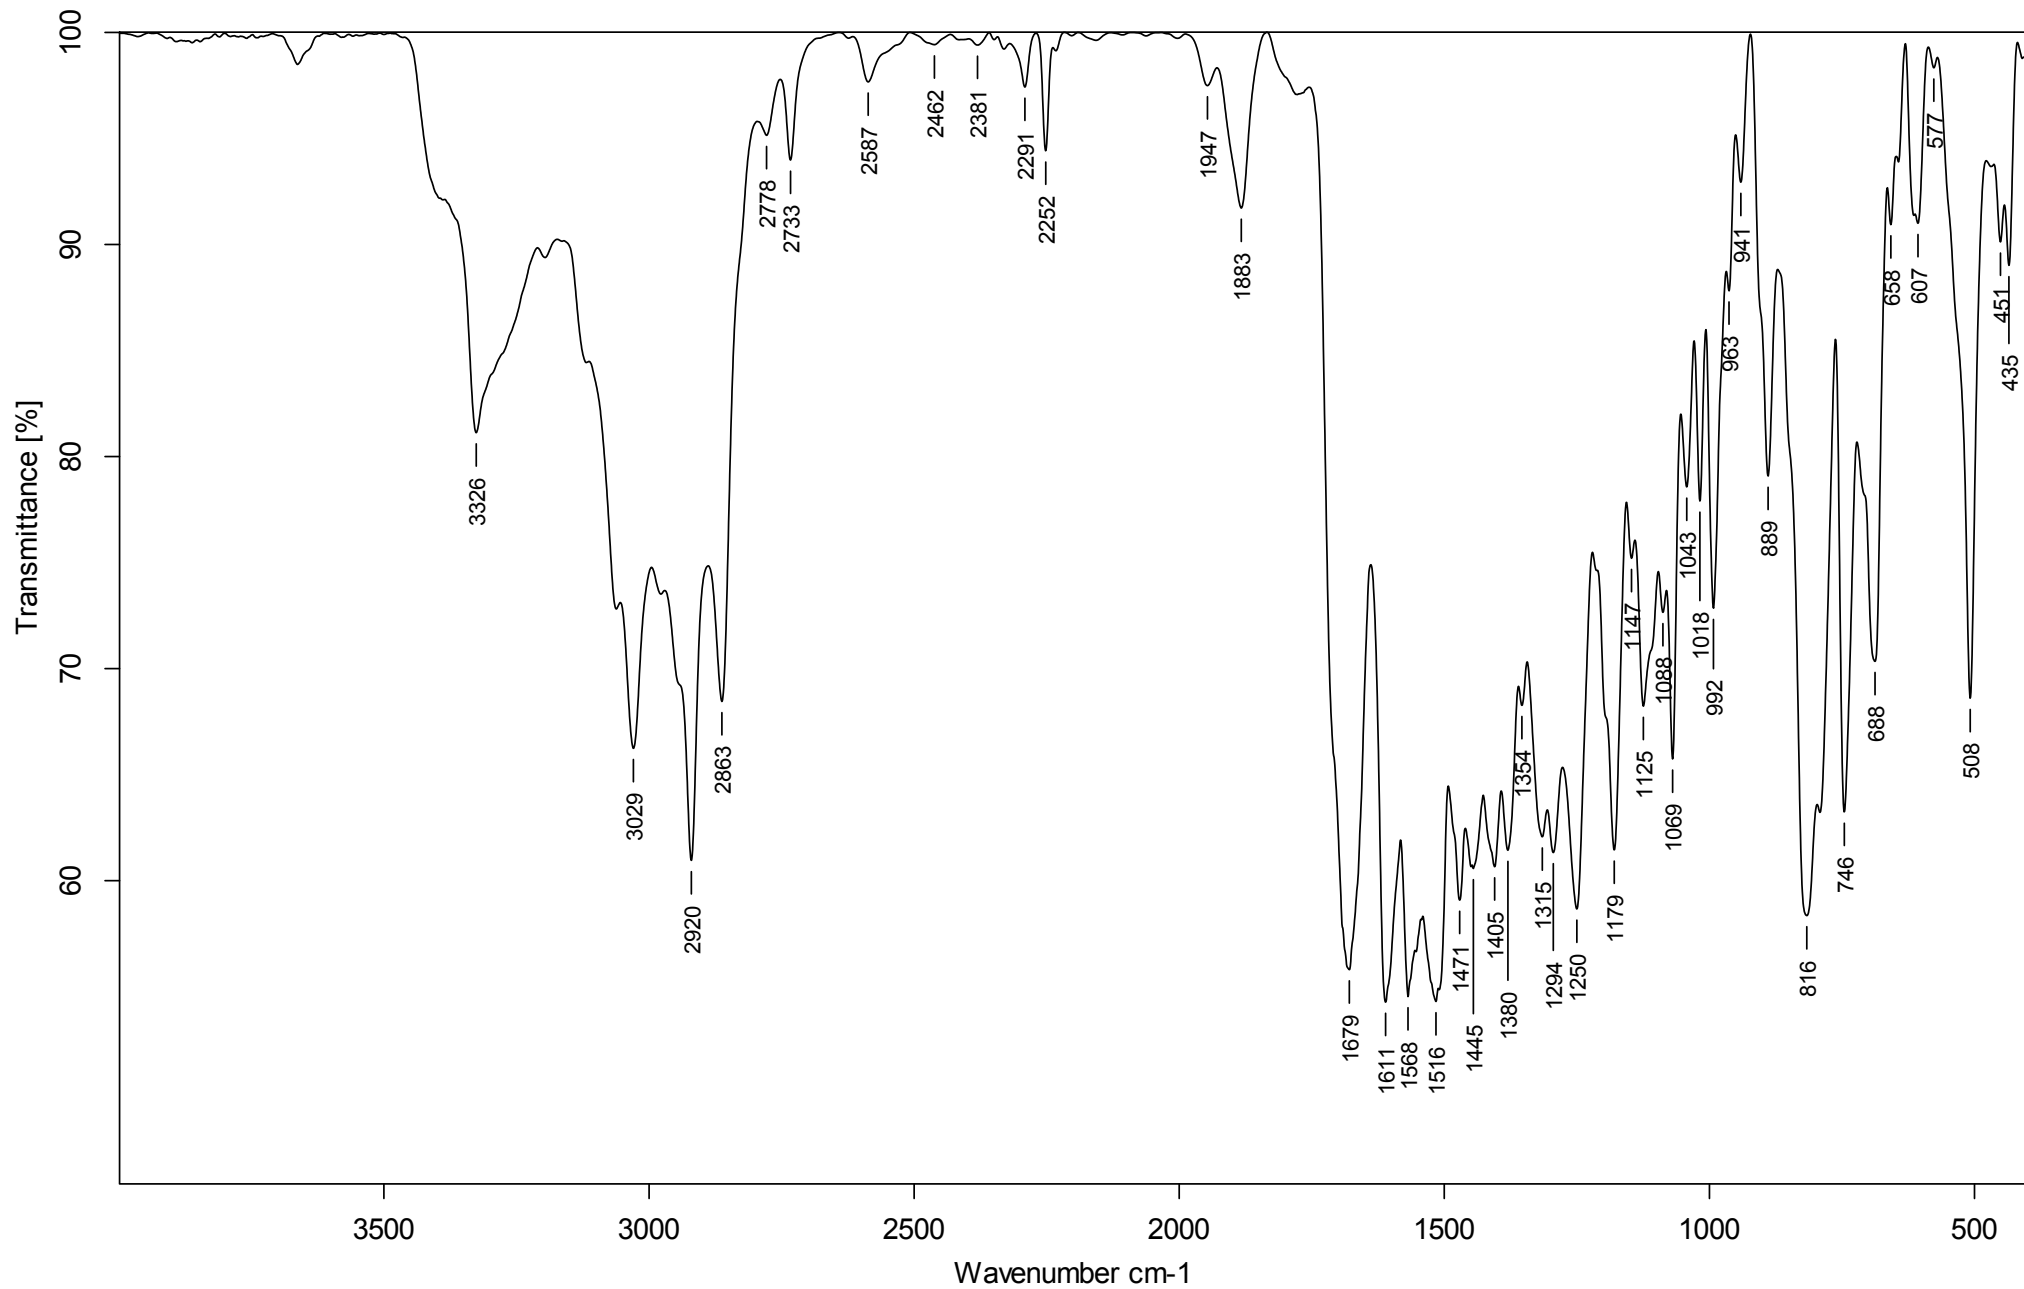

3h KBr

18.02.2022

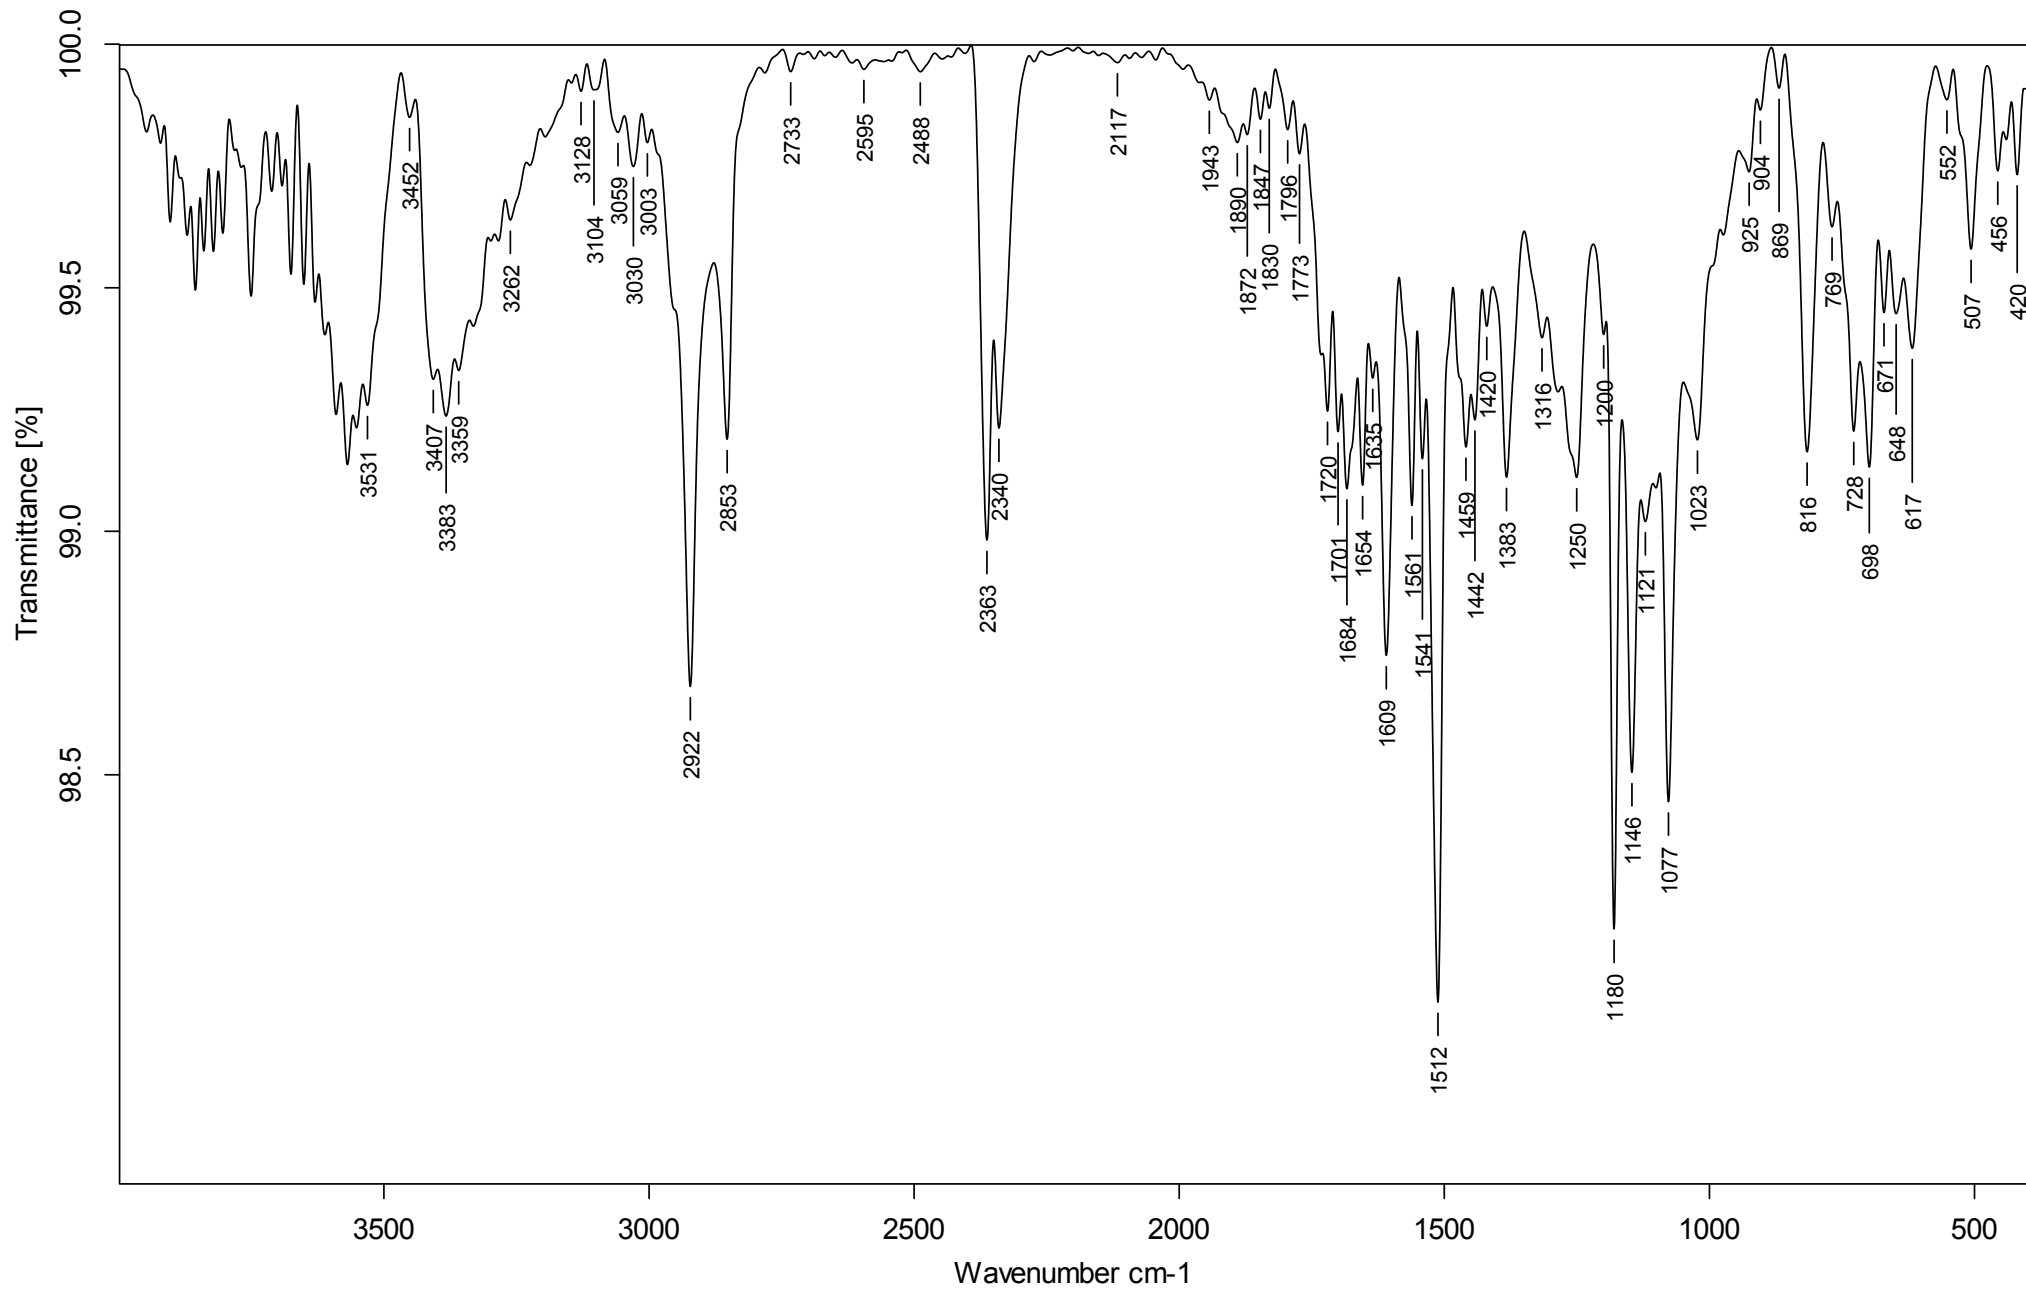

3i KBr

18.02.2022

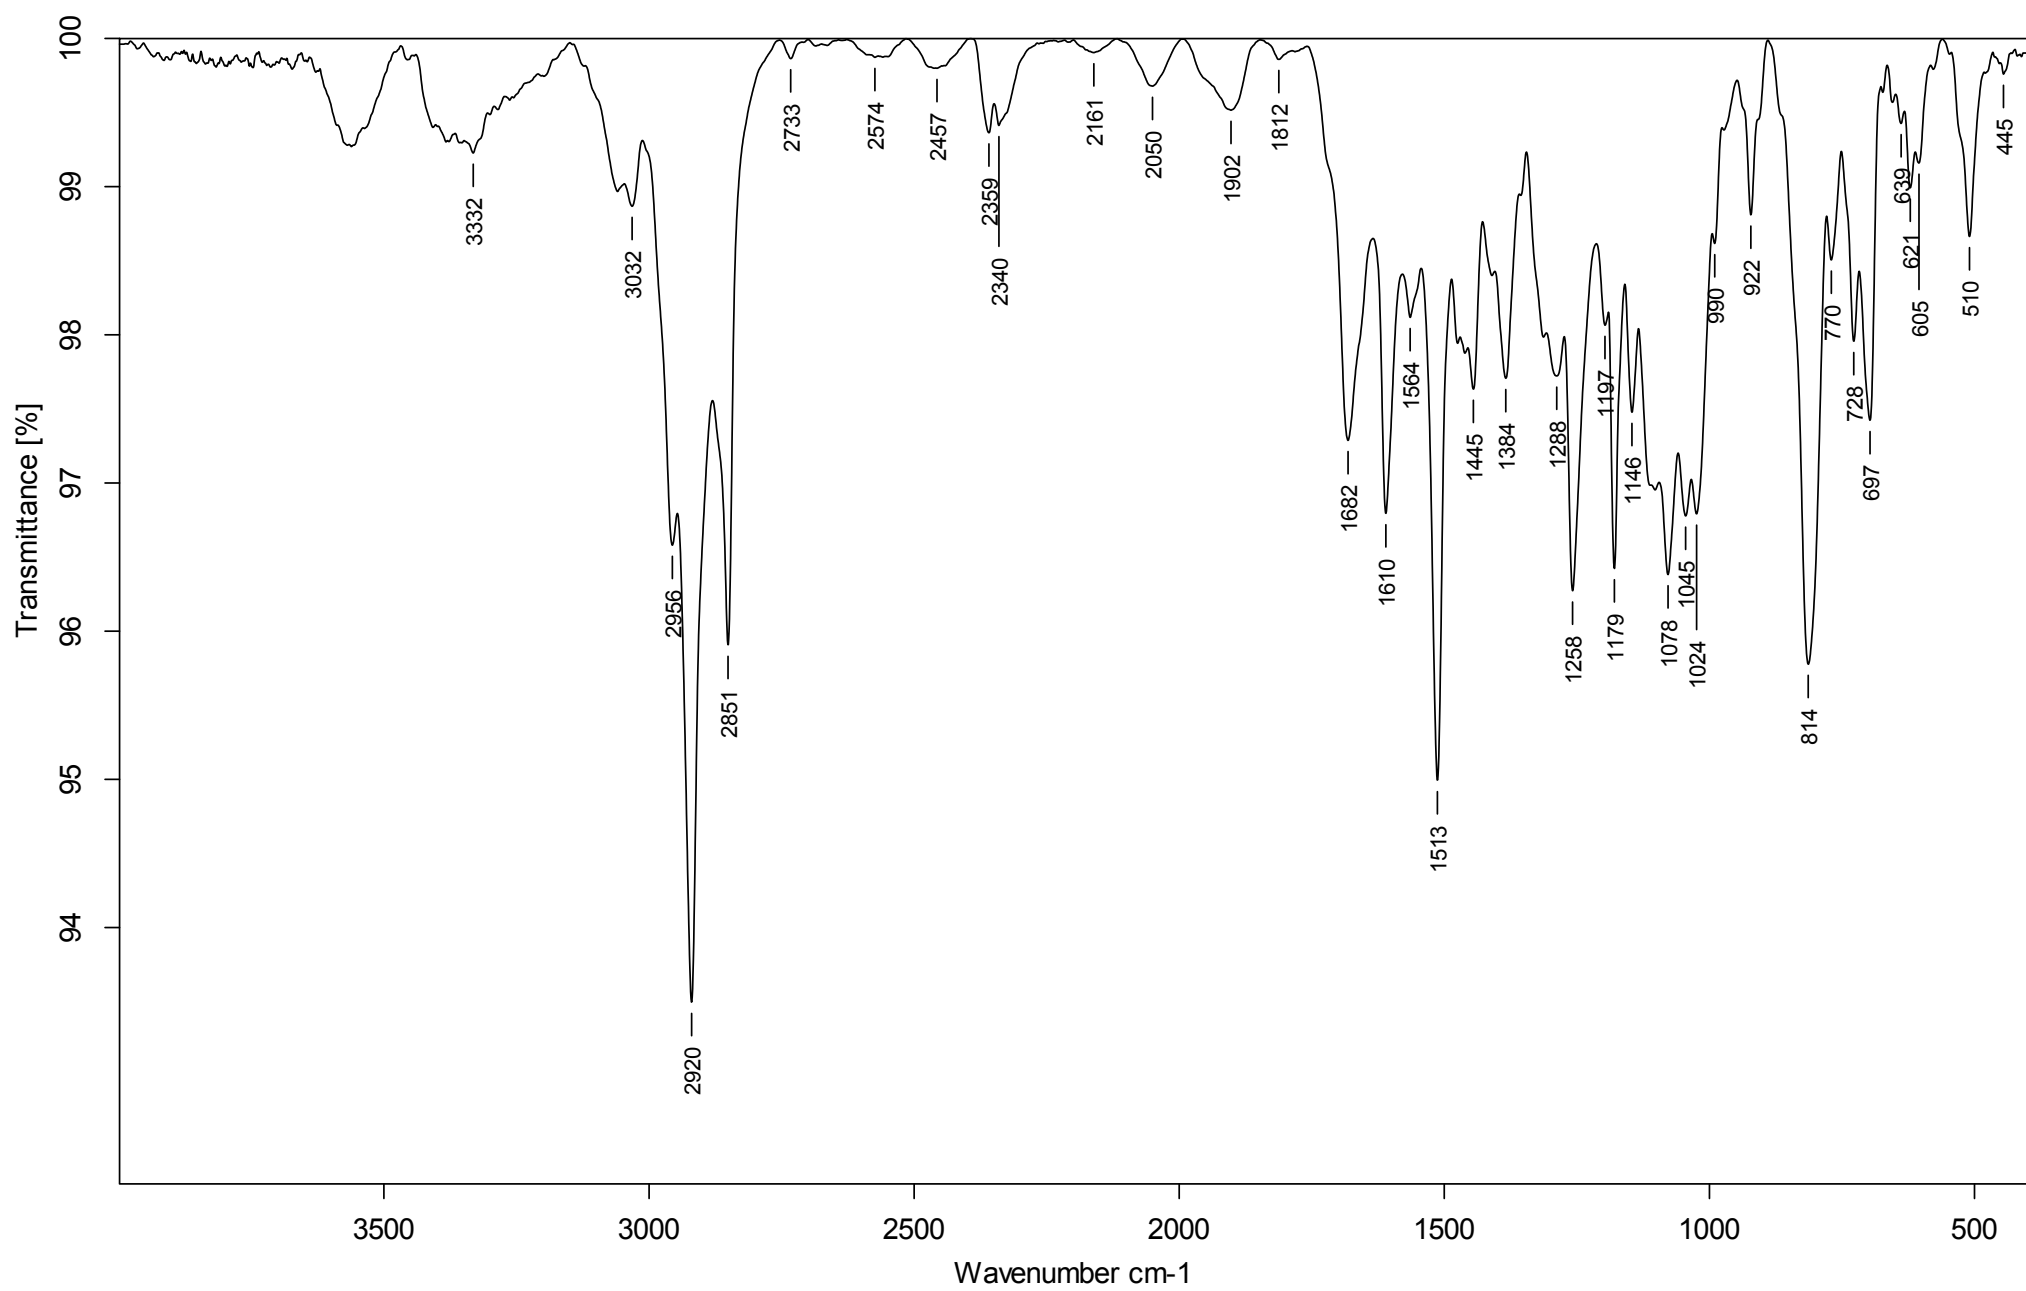

3j KBr

18.02.2022



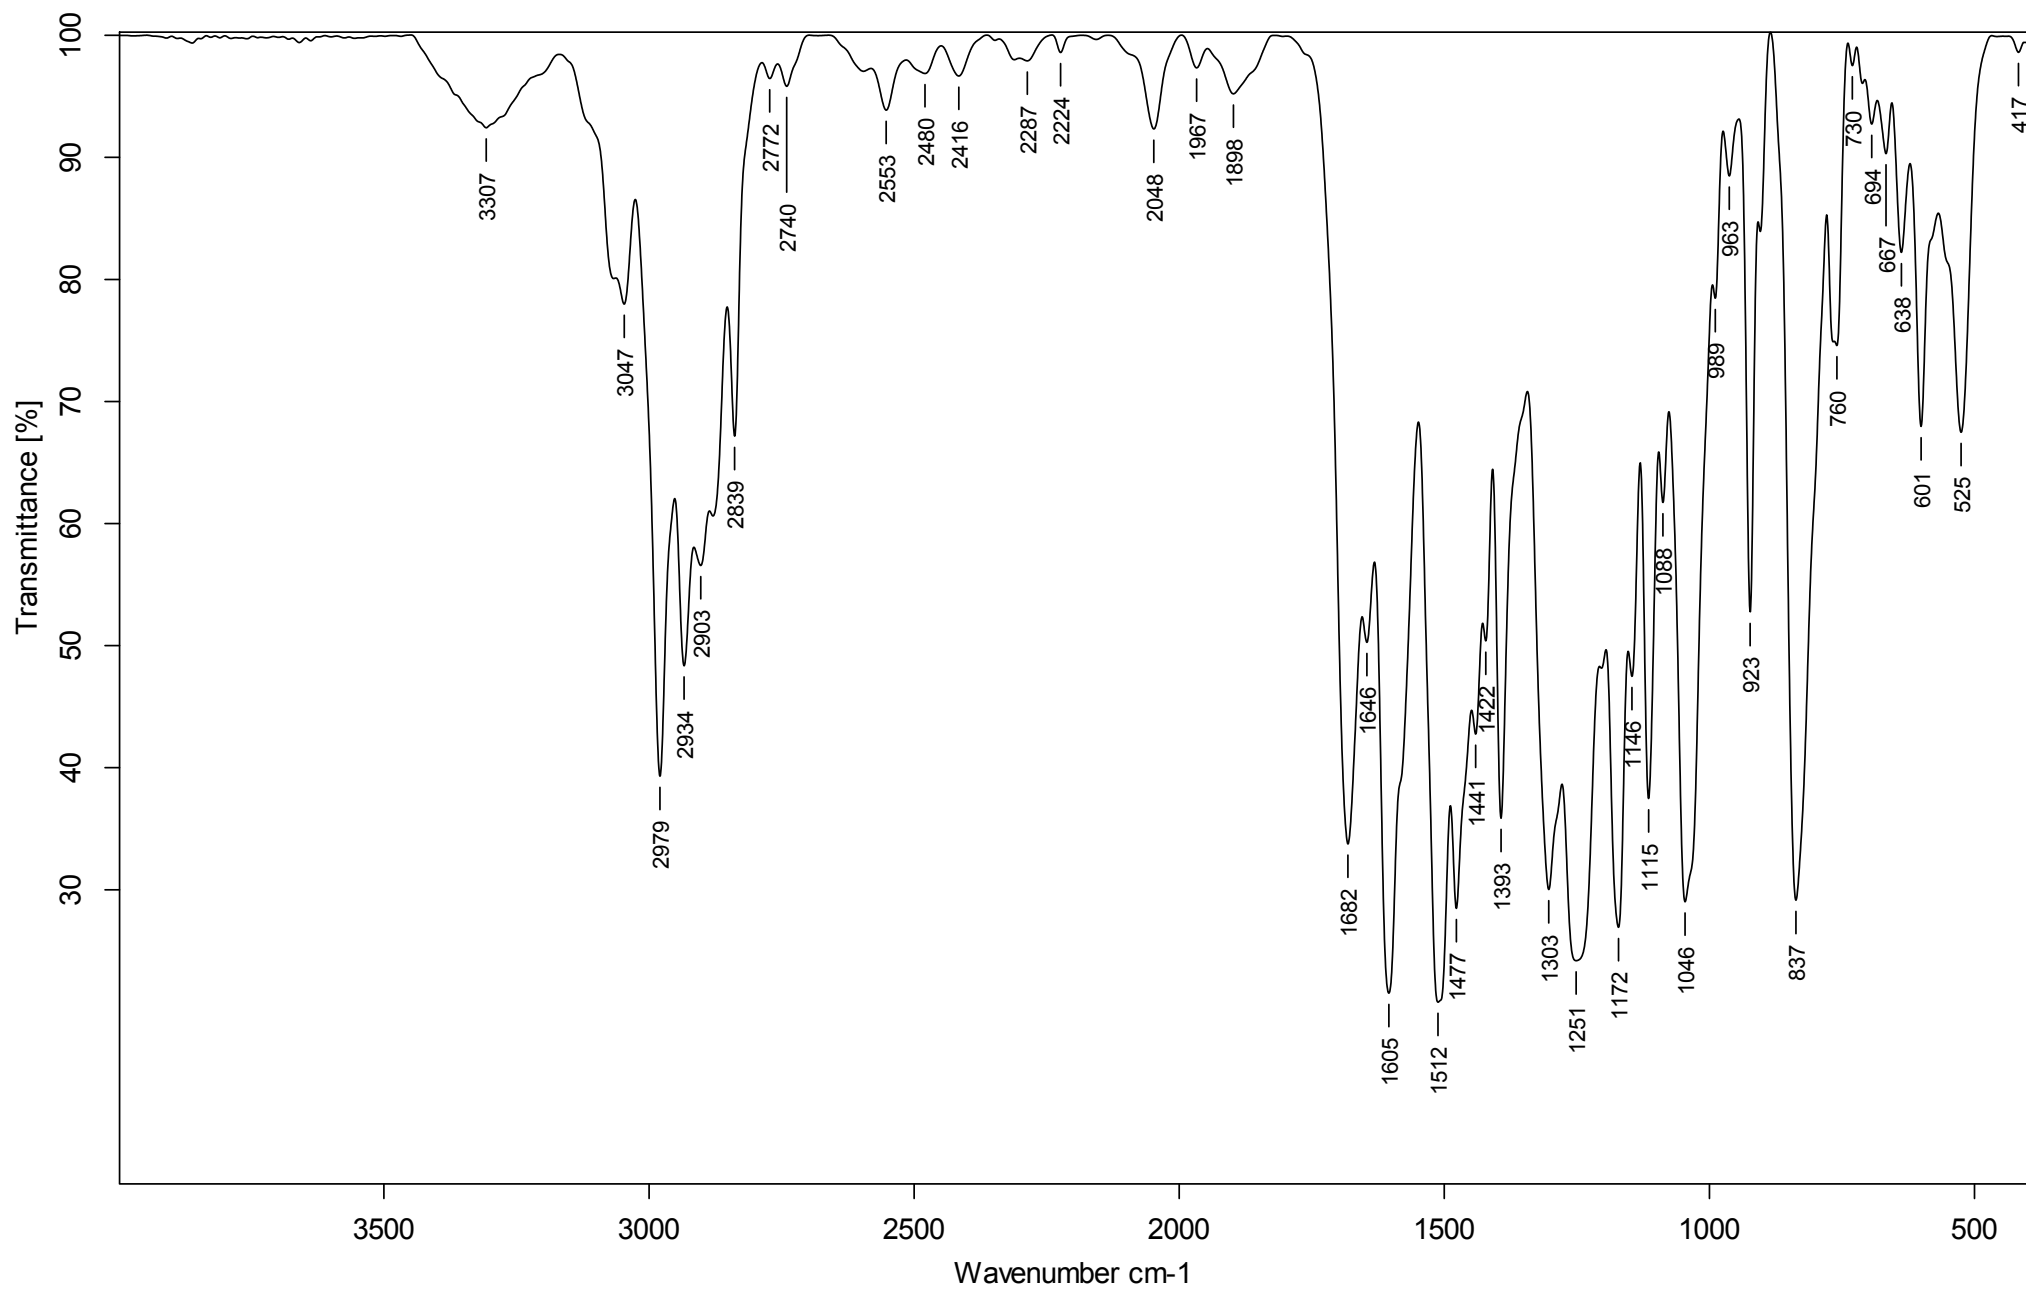

3k KBr

18.02.2022
